1 **The DAXX-SREBP axis promotes oncogenic lipogenesis and tumorigenesis**

2 Iqbal Mahmud<sup>1,2,3</sup>, Guimei Tian<sup>1</sup>, Jia Wang<sup>1,4</sup>, Jessica Lewis<sup>1</sup>, Aaron Waddell<sup>1</sup>, McKenzie L.  
3 Lydon<sup>1</sup>, Lisa Y. Zhao<sup>1,7</sup>, Jian-Liang Li<sup>5</sup>, Hamsa Thayele Purayil<sup>1</sup>, Zhiguang Huo<sup>6</sup>, Yehia Daaka<sup>1</sup>,  
4 Timothy J. Garrett<sup>2,3</sup>, Daiqing Liao<sup>1\*</sup>

5

6 <sup>1</sup> Department of Anatomy and Cell Biology, UF Health Cancer Center, University of Florida  
7 College of Medicine, 2033 Mowry Road, Gainesville, FL 32610-0235, USA

8 <sup>2</sup> Southeast Center for Integrated Metabolomics, Clinical and Translational Science Institute,  
9 University of Florida, Gainesville, FL 32610-0135, USA

10 <sup>3</sup> Department of Pathology, Immunology and Laboratory Medicine, University of Florida College  
11 of Medicine, 1600 Archer Road, Gainesville, FL 32610, USA

12 <sup>4</sup> Affiliated Dongzhimen Hospital, Beijing University of Chinese Medicine, Beijing, P. R. China

13 <sup>5</sup> Integrative Bioinformatics, National Institute of Environmental Health Sciences, Research  
14 Triangle Park, NC 27709, USA

15 <sup>6</sup> Department of Biostatistics, University of Florida, 2004 Mowry Road, Gainesville, FL 32611, USA

16 <sup>7</sup> Present Address: Department of Medicine, University of Florida College of Medicine, 1600  
17 Archer Road, Gainesville, FL 32610, USA

18

19 \* Correspondence and material requests should be addressed to D. Liao ([dliao@ufl.edu](mailto:dliao@ufl.edu)).

20

21 Running Title: The DAXX-SREBP axis in lipogenesis

22 **ABSTRACT**

23

24 De novo lipogenesis produces lipids for membrane biosynthesis and cell signaling. Elevated  
25 lipogenesis is a major metabolic feature in cancer cells. In breast and other cancer types, genes  
26 involved in lipogenesis are highly upregulated, but the mechanisms that control their expression  
27 remain poorly understood. DAXX modulates gene expression through binding to diverse  
28 transcription factors although the functional impact of these diverse interactions remains to be  
29 defined. Our recent analysis indicates that DAXX is overexpressed in diverse cancer types.  
30 However, mechanisms underlying DAXX's oncogenic function remains elusive. Using global  
31 integrated transcriptomic and lipidomic analyses, we show that DAXX plays a key role in lipid  
32 metabolism. DAXX depletion attenuates, while its overexpression enhances, lipogenic gene  
33 expression, lipid synthesis and tumor growth. Mechanistically, DAXX interacts with SREBP1 and  
34 SREBP2 and activates SREBP-mediated transcription. DAXX associates with lipogenic gene  
35 promoters through SREBPs. Underscoring the critical roles for the DAXX-SREBP interaction for  
36 lipogenesis, SREBP2 knockdown attenuates tumor growth in cells with DAXX overexpression,  
37 and a DAXX mutant unable to bind SREBPs are incapable of promoting lipogenesis and tumor  
38 growth. Our results identify the DAXX-SREBP axis as an important pathway for tumorigenesis.

## 39 INTRODUCTION

40 Cancer cells exhibit elevated de novo intracellular lipogenesis, resulting in increased levels of  
41 fatty acids, membrane phospholipids, and cholesterol (1). Notably, de novo lipogenesis  
42 contributes minimally to the overall lipid content of normal non-proliferating cells, which generally  
43 rely on the uptake of lipids from the circulation. In contrast, highly proliferative cancer cells show  
44 strong avidity to acquire elevated lipids and cholesterol through either enhancing the uptake of  
45 exogenous (or dietary) lipids and lipoproteins or hyperactivating their endogenous de novo lipid  
46 synthesis mechanism (1,2). Increased de novo lipogenesis in cancer cells is thought to supply  
47 lipids for the synthesis of membranes and signaling molecules during rapid cell proliferation and  
48 tumor growth, due to limited availability of lipids from the circulation in the tumor microenvironment  
49 (1,3). De novo lipogenesis is controlled by several transcription factors, such as the sterol  
50 regulatory element-binding proteins, SREBP1 and SREBP2 (SREBP1/2), that have been shown  
51 to play an important role in maintaining lipid synthesis in cancer (4). SREBP1/2 precursors are  
52 sequestered in endoplasmic reticulum. When sterol supply is low, SREBP1/2 are transported to  
53 the Golgi apparatus where they are cleaved by proteases, and the N-terminal domains of SREBPs  
54 are then released and imported into the nucleus to promote transcription of genes that contain  
55 the sterol regulatory elements (*SREs*) required for lipogenesis.

56

57 Independently of intracellular lipid levels, oncogenic drivers, including KRAS and PI3K, promote  
58 de novo lipogenesis in BC and other cancer types converging on mTORC1 activation (1,5-7).  
59 mTORC1 promotes S6K1-dependent SREBP1/2 processing (8). The phosphatidate phosphatase  
60 Lipin-1 sequesters mature SREBP1/2 in the nuclear lamina, thereby preventing SREBP1/2 from  
61 activating gene expression. mTORC1 directly phosphorylates Lipin-1, which inhibits its nuclear  
62 translocation and thus restores SREBP activity (9). mTOR signaling also indirectly stabilizes  
63 SREBP1/2 by opposing phosphorylation-dependent ubiquitination of SREBP1/2 by the E3  
64 ubiquitin ligase FBXW7 and subsequent proteasomal degradation (10-12). Notably, tumors

65 efficiently convert acetate to acetyl-CoA (13), which is predominantly used for lipid synthesis (14),  
66 highlighting the need for cancer cells to activate lipogenic enzymes (15). While the dependence  
67 on de novo lipogenesis in cancer is well documented, the mechanisms that control SREBP-  
68 mediated transcription underlying oncogenic de novo lipogenesis remain poorly understood.

69

70 DAXX, originally discovered as a context-dependent regulator of cell death or survival (16-18),  
71 has an extensively documented role in transcription regulation through interacting with  
72 transcription factors including p53 (19) and NF- $\kappa$ B (20). More recent studies have defined DAXX  
73 as a specific chaperone for the histone variant H3.3 (21-23). DAXX binds specifically to the  
74 H3.3/H4 dimer and deposits it onto chromatin (24,25). Emerging evidence suggests that DAXX  
75 has an oncogenic role in diverse cancer types (26,27), which appears to be linked to its functions  
76 in gene regulation (18,27,28). Whereas the levels of DAXX expression directly correlate with its  
77 ability to promote tumor growth (18,26-28), the molecular mechanisms underlying DAXX's  
78 oncogenic function remain to be defined.

79

80 In this study, we identified DAXX as a novel regulator of oncogenic lipogenesis through its  
81 interaction with SREBP1/2, leading to activating lipogenic gene expression programs and the  
82 promotion of cancer cell proliferation in vitro and tumor growth in vivo. Our studies define the  
83 DAXX-SREBP axis as a previously unrecognized oncogenic pathway.

## 84 **MATERIALS AND METHODS**

85

### 86 **Cell culture**

87 Cell lines used for this study were obtained from ATCC (Manassas, VA) and authenticated by  
88 Genetica DNA Laboratories (Burlington, NC). Cells were cultured in Dulbecco's Modified Eagle's  
89 Medium (DMEM with 4.5 g/L glucose, L-glutamine and sodium pyruvate, Corning, Tewksbury,  
90 MA) with 10% bovine calf serum (HyClone, GE Healthcare Bio-Sciences, Pittsburgh, PA),  
91 penicillin (10 units/mL), and streptomycin (10 µg/mL) (the complete DMEM medium). The T47D  
92 cell line was cultured in DMEM plus 10% fetal bovine serum (Atlanta Biologics, Atlanta, GA),  
93 penicillin (10 units/mL), and streptomycin (10 µg/mL). To culture cells in serum starvation  
94 condition, serum-containing medium was removed from cell cultures after overnight culture and  
95 the culture was washed once with phosphate-buffered saline (PBS, without calcium and  
96 magnesium, Corning). Cells were then cultured in serum-free DMEM. For culturing cells in  
97 suspension (3D culture), plates were coated with a 1:1 mixture of Matrigel (Corning) and complete  
98 DMEM medium. A desirable number of cells were suspended in the Matrigel and medium mixture  
99 and layered on the top of the solidified Matrigel. Complete DMEM medium was added after the  
100 Matrigel was solidified. Medium was replaced with fresh complete medium every three days.  
101 Colonies were imaged under a microscope; colony numbers and sizes were quantified.

102

### 103 **DNA constructs**

104 cDNAs for wild-type (WT) DAXX and mutants with a 5' coding sequence for the FLAG epitope tag  
105 and a 3' coding sequences for the MYC and 6x His tags were cloned into a lentiviral vector under  
106 the control of the cytomegalovirus immediate early (CMV *IE*) promoter. GFP-DAXX constructs  
107 were cloned in the pEGFP-C2 vector. A short hairpin RNA (shRNA) targeting the DAXX coding  
108 sequence (nucleotide 624-642, 5'-GGAGTTGGATCTCTCAGAA-3') was cloned into a lentiviral  
109 vector under the control of the human H1 promoter. An shRNA construct with a scrambled

110 sequence (Plasmid # 36311) was from Addgene. Expression vectors for mature SREBP1a  
111 (Plasmid # 26801), mature SREBP1c (Plasmid # 26802), and mature SREBP2 (Plasmid # 26807)  
112 were purchased from Addgene. The shRNA clones for *SREBF1* (TRCN0000020607 and  
113 TRCN0000020605), and *SREBF2* (TRCN0000020667 and TRCN0000020668) were from the  
114 human pLKO.1 TRC Library collection at the University of Florida. The *SREBF2* shRNA vector  
115 TRCN0000020667 was used to knockdown *SREBF2* expression in MDA-MB-231 cells with DAXX  
116 OE. A *SREBF2* promoter fragment was PCR amplified from the genomic DNA isolated from MDA-  
117 MB-231 cell line and cloned at sites upstream of the firefly luciferase reporter by the Gibson  
118 assembly method. The DNA sequence was confirmed by Sanger sequencing. The PCR primers  
119 are shown in Supplementary Table S1. Stable expression of cDNA and shRNA was established  
120 through lentiviral transduction of cell lines and puromycin (2 µg/mL) selection. The derived cell  
121 lines were cultured with DMEM without puromycin.

122

### 123 **Microarray, RNA-seq and qRT-PCR**

124 Cells were cultured in the complete DMEM or serum-free DMEM, and total RNAs were isolated  
125 using the RNeasy kit (Qiagen) for microarray and RNA-seq analysis. For microarray experiments,  
126 the RNAs were then processed for microarray hybridization to the Affymetrix GeneChip Human  
127 Transcriptome Array 2.0 as described previously (29,30). Total RNAs were used for RNA-seq  
128 library constructions and sequencing was done with 20M raw reads/sample using the Illumina  
129 Platform PE150 at Novogene Corporation Inc. (Sacramento, CA).

130

131 For quantitative real-time PCR (RT-qPCR), the isolated RNAs were reverse transcribed with  
132 random hexamers using 2 µg of total RNA, an RNase inhibitor, and reagents in the Multiscribe  
133 reverse transcriptase kit (Life Technologies). The resulting cDNAs were diluted and used as input  
134 for qPCR using the SYBR green detection method. The relative levels of gene expression were

135 determined using the  $\Delta\Delta C_t$  method with the  $C_t$  values of ACTB expression as the common  
136 normalizer. The primers for qPCR and other applications are shown in Supplementary Table S1.

137

### 138 **Immunoprecipitation (IP) and Immunoblotting**

139 Cell pellets were resuspended in the IP lysis buffer (50 mM Tris-HCl, pH 7.5, 0.5% Igepal-CA630,  
140 5% glycerol, 150 mM NaCl, 1.5 mM  $MgCl_2$ , and 25 mM NaF) containing 100-fold diluted protease  
141 inhibitor cocktail (Millipore-Sigma P8340). The cell suspension was subjected to two  
142 freezing/thawing cycles. The cell lysates were then centrifuged at 15,000 rpm at 4°C for 20 min.  
143 The supernatant was used for IP with a control or an antibody to a specific protein at 2  $\mu$ g per IP  
144 in the presence of protein A-agarose beads. The beads were resuspended in the IP lysis buffer  
145 along with one fifth of the volume of the 6x SDS sample buffer (0.375 M Tris-HCl, pH 6.8, 12%  
146 SDS, 60% glycerol, 0.6 M DTT, and 0.06% bromophenol blue). Samples were heated at 95°C for  
147 5 min and chilled on ice for 2 min. After brief centrifugation, the samples were loaded on a 4-20%  
148 gradient gel (Novex Tris-Glycine Mini Gels, ThermoFisher). Proteins were then electrotransferred  
149 to an Immobilon®-P polyvinylidene fluoride (PVDF) membrane (Millipore). Membrane was  
150 blocked with 5% non-fat milk, incubated with a primary antibody and a proper secondary antibody.  
151 The proteins were detected using a chemiluminescent detection kit (Millipore) and the Fuji Super  
152 RX-N X-ray films or an Amersham Imager 680.

153

154 For immunoblotting analyses of cell lysates of monolayer cultures, medium was removed from  
155 culture plates and 1x Passive Lysis buffer (Promega) was added. The plates were frozen at -80°C  
156 overnight and then thawed at room temperature. The lysates were transferred to a centrifuge tube.  
157 To prepare tumor lysates, xenograft tumor tissues were fragmented in the presence of liquid  
158 nitrogen, approximately 50 mg of tumor fragment was homogenized in 1 mL of 1X RIPA lysis  
159 buffer on ice using a micro-homogenizer. After brief sonication at a low power output for 5 sec on  
160 ice, the lysates were cleared by centrifugation at 13,000 rpm for 15 min at 4 °C. Protein contents

161 were quantified using a Qubit protein assay kit. Protein extracts from cell culture or tumor lysates  
162 were subjected to SDS-PAGE and electro-blotting as above. The antibodies used for this study  
163 are listed in Supplementary Table S2.

164

#### 165 **Proximity Ligation Assay (PLA)**

166 The PLA reagents were obtained from Millipore-Sigma (DUO92101-1KT). The assays were  
167 performed following the manufacturer's protocol. The antibodies against SREBP2 (Abcam,  
168 ab30682), SREBP1 (ProteinTech, 4088-1-AP), DAXX (5G11 hybridoma supernatant) were used  
169 for the PLA experiments. The number of PLA signal dots was quantified as described previously  
170 (31).

171

#### 172 **De novo lipogenesis assays**

173 Cells (0.5 million per well) were plated in a 6-well plate in complete DMEM medium in triplicate.  
174 At 24h after seeding, cells were washed once with PBS and cultured in serum-free DMEM for 16  
175 h; 5  $\mu$ Ci of [ $1\text{-}^{14}\text{C}$ ] acetate (NEC084H001MC, Perkin Elmer, Waltham, MA, USA) per mL was  
176 added and the cells were cultured for four more hours. Cells were then washed twice with PBS  
177 and trypsinized. Cells were pelleted and resuspended in 0.5 mL of 0.5% Triton X-100. The protein  
178 concentration of the lysates was determined for normalization. The lysates were extracted with  
179 ice cold chloroform/methanol (2:1 v/v). After centrifugation at 1,000 rpm for 20 min, the organic  
180 phase was collected and air dried. The radioactivity was determined with a liquid scintillation  
181 counter (Beckman LS 5000TD). The radioactivity was normalized against protein concentration.

182

#### 183 **Liquid chromatography (LC)-mass spectrometry (MS) experiments**

184 For lipid analysis, we used these internal lipid standards: triglyceride (TG 15:0/15:0/15:0 and TG  
185 17:0/17:0/17:0, Sigma-Aldrich), lysophosphatidylcholines (LPC, 17:0 and 19:0),  
186 phosphatidylcholines (PC, 17:0/17:0 and 19:0/19:0), phosphatidylethanolamines (PE, 15:0/15:0



187 and 17:0/17:0), phosphatidylserines (PS, 14:0/14:0 and 17:0/17:0), and phosphatidylglycerols  
188 (PG, 14:0/14:0 and 17:0/17:0) (Avanti Polar Lipids, Alabaster, AL). The lipid standards were  
189 dissolved in 2:1 (v/v) chloroform/methanol to make a 1000 ppm stock solution and a working 100  
190 ppm standard mix was then prepared by diluting the stock solution with the same solvent mixture.  
191 For sample normalization, total protein concentration in each sample was determined using a  
192 Qubit 3.0 Fluorometer.

193  
194 Cell lines with a control vector, an shRNA against an indicated gene, WT DAXX, or the del 327-  
195 335 mutant were cultured with the complete DMEM. When cells grew to approximately 80%  
196 confluency, they were washed twice with PBS and cells were detached using a cell lifter. Cell  
197 pellets were washed twice with 40 mM ammonium formate (AF). The cell pellets were  
198 resuspended in 50  $\mu$ L of AF with vortex in a glass vial and subjected to high efficient bead beater  
199 cell disruption to release intracellular lipids. A small amount of the homogenized cell pellet was  
200 taken for Qubit protein concentration determination. Lipids were extracted by adding ice-cold  
201 chloroform (2 mL) and methanol (1 mL) along with 20  $\mu$ L of internal standard mixtures. The  
202 extraction mixture was incubated on ice for 1 h with occasional vortex mixing. Finally, 1 mL H<sub>2</sub>O  
203 was added to the mixture, which was incubated for 10 min with occasional vortex mixing. Samples  
204 were then centrifuged at 2,000 rpm for 5 min. The lower phase (organic layer) was collected in a  
205 separate glass vial and subjected to dry under nitrogen gas at 30 °C using a dryer (MultiVap,  
206 Organomation Associates). Dried samples were reconstituted by adding 50  $\mu$ L isopropyl alcohol  
207 and transferred to a glass LC vial with insert. Samples were loaded to an auto-sampler at 5 °C.

208  
209 For analyzing lipids, we ran samples for quality control (QC) in each instrument run. A pooled QC  
210 sample (a 25  $\mu$ L aliquot) for each extraction was injected after analyzing every five samples. The  
211 pooled QC sample was run to assess system reproducibility, and a blank (solvent mixture only)  
212 was used to flush the column. We did not observe any changes regarding the number of

213 background ions, which always corresponded to the specific solvent used for lipid extraction. Also,  
214 we did not notice any effects on reproducibility of ion source regardless of solvents used for  
215 extraction. The stability and repeatability of the instruments were evaluated using identical neat  
216 QC samples (a mixture of all internal standards in deuterated form) throughout the process of  
217 sample injection. Principal component analysis (PCA) was performed to evaluate the variation of  
218 QC samples. All neat QC samples clustered together, confirming the stability and reproducibility  
219 of our experimental lipid analysis system.

220

221 For data collection, processing, and analysis, we used a Dionex Ultimate 3000 UHPLC system  
222 coupled to a Q Exactive™ hybrid quadrupole-orbitrap mass spectrometer operated in HESI-  
223 positive and negative ion mode. A Supelco Analytical Titan reverse-phase column (RPC) C18  
224 (2.1 × 75 mm with 1.9 μm monodisperse silica) equilibrated at 30 °C with solvents A (acetonitrile  
225 and water 60:40, v/v) and B (isopropyl alcohol, acetonitrile, and water 90:8:2, v/v/v) as mobile  
226 phases was used for data collection. The flow rate was 0.5 mL/min, and the injection volume was  
227 5 μL. The total run time was 22 min, including a 2-min equilibration. The MS conditions for positive  
228 and negative ion modes were spray voltage at 3.5 kV, sheath gas at 30 arbitrary units, sweep gas  
229 at 1 arbitrary unit, auxiliary nitrogen pressure at 5 arbitrary units, capillary temperature at 300 °C,  
230 HESI auxiliary gas heater temperature at 350 °C, and S-lens RF at 35 arbitrary units. The  
231 instrument was set to acquire in the mass range of most expected cellular lipids and therefore  
232 *m/z* 100–1500 was chosen with a mass resolution of 70,000 (defined at *m/z* 200). Global lipid  
233 profiling was performed using full scan and ddMS2 (data dependent MS-MS).

234

235 Data were recorded from 0.0 to 17 min as total ion chromatography (TIC) and then corresponding  
236 MS data were extracted using Thermo Xcalibur (version 2.2.44). After data collection, raw data  
237 files were converted to mzXML format using the Proteowizard MSConvert software. MZmine 2.15  
238 (freeware) was used for mass detection with mass detector centroid noise set at 1.0E05 using

239 only MS level 1 data; chromatogram building and deconvolution were then applied (m/z tolerance,  
240 0.005 or 10 ppm; retention time tolerance, 0.2 min; minimum time span, 0.1 min; and minimum  
241 height, 5.0E05) followed by isotope grouping, alignment (m/z tolerance, 0.005 or 10 ppm;  
242 retention time tolerance, 0.2 min), and gap filling (m/z tolerance, 0.005 or 10 ppm; retention time  
243 tolerance, 0.2 min, and intensity tolerance 25%). MZmine-based online metabolite search engine  
244 KEGG, MMCD database, XCMS online database, Metaboanalyst 3.0, R program, and internal  
245 retention time library were used for the identification and analysis of metabolites.

246

### 247 **In vivo tumor growth**

248 All mice were maintained under pathogen-free conditions. Female NSG (NOD.Cg-  
249 Prkdc<sup>scid</sup>Il2rg<sup>tm1Wjl</sup>/SzJ) mice, between the ages of 4-6 weeks, were injected subcutaneously in a  
250 mammary fat-pad area with one million cells in 100  $\mu$ L of complete DMEM (MDA-MB-231-derived  
251 cell lines) or in a suspension of 50  $\mu$ L of Matrigel and 50  $\mu$ L of cell suspension (MDA-MB-468-  
252 derived cell lines). Tumor growth was monitored by measuring tumor dimensions using a digital  
253 caliper once a week until endpoint. Tumor volume was calculated with the formula  $\frac{1}{2} \times \text{length} \times$   
254  $\text{width}^2$ . At the endpoint, mice were euthanized, tumors were excised, weighted, and photographed.  
255 Tumor lysates were prepared for immunoblotting analysis. Animal use has been approved for this  
256 project by the University of Florida IACUC.

257

### 258 **Chromatin immunoprecipitation (ChIP)**

259 The panel of MDA-MB-231-derived cell lines (control and WT DAXX OE) were cultured in  
260 complete DMEM. ChIP experiments were performed essentially as described (32). Briefly, at  
261 about 90% confluency, the cells were crosslinked by adding 37 % formaldehyde to the final  
262 concentration of 1% for 10 min at room temperature. Crosslinking was stopped by adding glycine  
263 to the final concentration of 125 mM. Cells were lifted, washed with cold PBS, and pelleted by  
264 centrifugation. The cells were resuspended in a swelling buffer in the presence of the protease

265 inhibitor cocktail (Sigma) and then pelleted and resuspended in the SDS lysis buffer. The lysates  
266 were transferred to a Covaris microTUBE and sonicated with an E220 Covaris Ultrasonicator.  
267 Chromatin fragmentation (~500 bps) was verified by agarose gel electrophoresis. The fragmented  
268 chromatin was diluted and incubated with a control IgG and the DAXX mAb (5G11) along with  
269 protein A/G magnetic beads. The beads were washed sequentially with a low salt buffer, high salt  
270 buffer, LiCl buffer, and TE buffer (twice). The immunoprecipitated chromatin was eluted at 65 °C  
271 for 15 min, and the eluted chromatin was subjected to proteinase K digestion at 65 °C for 3 h.  
272 The DNAs were recovered through a Qiagen mini-prep column. The immunoprecipitated DNAs  
273 were used for qPCR and library construction and high throughput sequencing using an Illumina  
274 Hi-Seq 2500 sequencer.

275

## 276 **Bioinformatics analysis**

277 We analyzed gene expression based on publicly available datasets. Gene expression data for  
278 normal, benign, primary, and metastatic tumor samples were included for our analysis.  
279 Normalized expression levels for specific genes were compared between different sample types.  
280 Computations were conducted in R statistical package ([https:// www.r-project.org/](https://www.r-project.org/)) and in  
281 GraphPad Prism 7.0. For Ingenuity Pathway Analysis (IPA), genes that were differentially  
282 expressed (fold-change over  $\pm 1.3$  and p-value < 0.05) were used for the Ingenuity Pathway  
283 Analysis (Ingenuity Systems, Qiagen Bioinformatics, <http://www.ingenuity.com>). Gene Set  
284 Enrichment Analysis (GSEA) was performed using the Java desktop software  
285 (<http://software.broadinstitute.org/gsea/index.jsp>), as described previously (33). The GSEA tool  
286 was used in pre-ranked mode with all default parameters. For microarray data analysis, probe set  
287 files (.cel file) were normalized by RMA algorithm and analyzed using both R statistical package  
288 as well as Affymetrix expression and transcriptome console software from ThermoFisher  
289 Scientific. For RNA-seq data analysis, we used the RNAseq data analysis pipeline reported  
290 previously (34). Briefly, fastq files were aligned to Genome Reference Consortium Human Build

291 38 (GRCh38) using HISAT2 (35); the transcripts assembling was performed using StringTie (36)  
292 with RefSeq as transcripts ID; and the normalized counts (by FPKM) was called using Ballgown  
293 (37). The differential expression analysis was performed using R package limma (38); and the  
294 pathway enrichment analysis was performed using ingenuity pathway analysis. ChIP-seq  
295 sequencing reads (Fastq files) were mapped to the human genome (GRCh37/hg19) using  
296 Bowtie2 (39), where option `-local` was specified to trim or clip unaligned reads from one or both  
297 ends of the alignment. Genome browser BedGraph tracks and read density histograms were  
298 generated using SeqMINER. Peak finding and annotation to the nearest Refseq gene promoter  
299 was performed and de novo motif discovery was carried out using HOMER (40).

300

### 301 **Statistical analysis**

302 Gene expression assays were conducted in two to three biological replicates. Metabolic profiling  
303 assays were performed in four to six replicates. Data are presented as the mean along with  
304 standard error of the mean (SEM). Student's t-test was used to compare two groups of  
305 independent samples. For all data analysis,  $p < 0.05$  was considered statistically significant.

306

## 307 RESULTS

### 308 Transcriptomic profiling implicates DAXX in promoting lipogenic gene expression

309 Bioinformatic analyses of clinical BC samples of The Cancer Genome Atlas (TCGA) and the  
310 Clinical Proteomic Tumor Analysis Consortium (CPTAC) datasets revealed that DAXX mRNA and  
311 protein levels are elevated in all four major BC subtypes with highest levels in the triple-negative  
312 BC (TNBC) subtype (Figure 1A and B), suggesting a potential oncogenic role for DAXX (18). To  
313 understand the function of DAXX in cancer, we used gain and loss of function approaches:  
314 genetically depleted endogenous DAXX or overexpressed wild-type (WT) DAXX in the TNBC cell  
315 line MDA-MB-231 (Figure 1C). Transcriptomic analyses using microarray and RNA-seq revealed  
316 distinct gene expression profiles for cells with DAXX mRNA knockdown (KD) and WT DAXX  
317 overexpression (OE) in comparison to control (CTL) cells (Figure 1D and E). Unexpectedly,  
318 Ingenuity Pathway Analysis (IPA) of differentially expressed genes in cells with DAXX KD or OE  
319 in comparison to CTL cells revealed a marked downregulation and upregulation, respectively, of  
320 the de novo lipogenesis pathways. Lipogenesis regulators (*SREBF1/2* encoding SREBP1/2 and  
321 SCAP) were among the most highly inhibited upstream regulators in the KD cells, while WT DAXX  
322 OE activated *SREBF1/2* (Figure 1F). Correspondingly, the cholesterol biosynthesis via the  
323 mevalonate pathway were among the top canonical pathways identified by IPA (Supplementary  
324 Figure S1A). Most of the genes in the biosynthesis of cholesterol, fatty acids, glycerolipid, and  
325 glycerophospholipids are affected by DAXX expression levels (Figure 1E). Gene Set Enrichment  
326 Analysis (GSEA) of transcriptomic data confirmed suppression and activation of the de novo  
327 lipogenesis pathway by DAXX KD and WT OE, respectively (Supplementary Figure S1B and C).  
328 Of note, several transcriptional regulators that are known to interact with DAXX such as JUN and  
329 PML (18) were also affected by DAXX expression levels. Interestingly, the insulin receptor (INSR)  
330 pathway that regulates intracellular lipid production (41) also seems to be positively regulated by  
331 DAXX (Figure 1F).

332

333 RT-qPCR analyses provided validation for the microarray results (Supplementary Figure S2). The  
334 impact of DAXX knockdown or overexpression on lipogenic gene expression was further validated  
335 by immunofluorescence microscopy and immunoblotting (Supplementary Figure S2B and C).  
336 Using a tetracycline-inducible gene expression system, we found that DAXX induction increased  
337 lipogenic gene expression (Supplementary Figure S2D), providing further evidence that DAXX  
338 directly activates lipogenic gene expression. In keeping with our findings, our analysis of public  
339 gene expression datasets based on human and mouse cells (42-44) indicated that DAXX is  
340 involved in promoting the SREBP/lipogenesis pathway (Supplementary Figure S3). Further  
341 analyses of the TCGA data indicate that DAXX expression levels positively correlate with that of  
342 SREBP1 and SREBP2 (Supplementary Figure S5) and a panel of lipogenic genes (Figure 1G).  
343 Notably, high mRNA levels of the gene set including DAXX shown in Figure 1G predict poor  
344 patient survival (Figure 1H). Collectively, these data provide evidence that DAXX may play an  
345 important role in promoting lipogenic gene expression.

346

#### 347 **DAXX promotes lipid production**

348 To determine whether transcriptomic differences correspond to an alteration of intracellular  
349 lipidome, the same panel of MDA-MB-231-derived cell lines used for our transcriptomic study  
350 were subjected to global lipidome analysis using LC-MS technique. Similar to transcriptomic  
351 profiles, control, DAXX KD and OE cells cluster into groups with distinct intracellular lipidomes  
352 (Figure 2A and B). A lipidome-based pathway analysis again revealed that DAXX expression  
353 levels significantly impact lipogenesis pathways (Figure 2C). To validate DAXX's role in  
354 lipogenesis, we depleted DAXX using CRISPR/Cas9 (Supplementary Figure S5A). Lipidomic  
355 profiling again showed that DAXX depletion significantly altered lipidomes (Supplementary Figure  
356 S5B-E).

357

358 To understand the broader role of DAXX in lipogenesis, we have explored correlation of DAXX  
359 expression with lipid production in different cancer types. We have depleted endogenous DAXX  
360 or overexpressed wild-type DAXX in another TNBC cell line MDA-MB-468 (Figure 2D).  
361 Consistent with lipidomic changes in cells derived from MDA-MB-231, global lipidomic profiling  
362 revealed that DAXX KD reduced, but WT OE increased levels of diverse lipid molecules,  
363 respectively, in MDA-MB-468-derived cells (Figure 2E-G). Principal component analysis (PCA)  
364 analysis indicated that MDA-MB-468 cells with different levels of DAXX expression exhibit distinct  
365 lipid profiles (Figure 2E). Pathway analyses based on metabolites identified the biosynthesis  
366 pathways of glycerophospholipid, steroid, glycerolipid and fatty acid metabolism as the top  
367 pathways influenced by DAXX expression levels (Figure 2G).

368

369 It is well known that cancer cells utilize acetate as an alternative carbon source to glucose for de  
370 novo lipogenesis (6). To assess whether DAXX affects acetate-driven de novo lipogenesis, we  
371 treated cells that express different levels of DAXX with [<sup>14</sup>C]-acetate. Quantification of the [<sup>14</sup>C]-  
372 labeled lipids showed that DAXX expression levels positively correlated with levels of intracellular  
373 lipids, with reduced or increased labeled lipids, respectively, in DAXX KD or DAXX OE in cells  
374 derived from MDA-MB-231 and MDA-MB-468 cells (Figure 2H). Diminished de novo lipogenesis  
375 upon DAXX depletion was also observed in BC cell lines of luminal subtypes (MCF7 and T47D)  
376 and the colon cancer cell line HCT116 (Figure 2H). Collectively, these metabolic experiments  
377 established a functional role for DAXX in de novo lipogenesis in cancer cells.

378

### 379 **DAXX is critical for tumor growth and lipogenesis in vivo**

380 As de novo lipogenesis is critical to cell proliferation and tumorigenesis (1,45), DAXX expression  
381 levels could impact cell growth in vitro and tumor growth in vivo due to alteration in lipid production.  
382 Indeed, DAXX knockdown reduced the number and size of colonies when compared to control,  
383 while WT DAXX OE had the opposite effects in three-dimensional cell culture model of MDA-MB-



384 231 (Supplementary Figure. S6).

385

386 Next, we examined effects of DAXX expression levels on tumor growth in vivo. In orthotopic BC  
387 xenograft models using female mice, DAXX knockdown markedly reduced while WT DAXX OE  
388 significantly increased tumor growth of both MDA-MB-231 and MDA-MB-468 TNBC cell lines  
389 (Figure 3A and B). Despite the notable difference in the tumor growth rate between the MDA-  
390 MB-231 and the MDA-MB-468 xenograft tumors, the effects of DAXX expression levels on tumor  
391 growth were clearly observed in both TNBC tumor models (Figure 3A and B). Immunoblotting  
392 analysis of tumor extracts showed that DAXX KD and OE were maintained in in vivo (Figure 3C).  
393 We profiled the lipids in xenograft tumors derived from cells with different levels of DAXX  
394 expression and lipid production. We found that the expression levels of DAXX positively  
395 correlated with elevated levels of lipids in xenograft tumors (Figure 3D). PCA analysis indicated  
396 that tumors with different DAXX expression levels exhibited distinct lipid profiles (Figure 3E).  
397 Overexpression of DAXX significantly elevated glycerophospholipids (Figure 3D), total TGs  
398 (n=350), and metabolites involved in cholesterol biosynthesis (Figure 3F). Altogether, our data  
399 demonstrate that DAXX promotes oncogenic lipogenesis and tumor growth in vivo.

400

#### 401 **DAXX interacts with SREBP1 and SREBP2**

402 SREBP1/2 are master transcription factors that promote lipid production when the intracellular  
403 levels of lipids/sterols are low (3,4,46). Because DAXX expression levels positively correlate with  
404 the activation of SREBP/lipid biosynthesis pathway (Figures 1–3), we reasoned that DAXX could  
405 regulate lipid biosynthesis through interacting with SREBPs. Immunoprecipitation (IP) of total cell  
406 extracts with an anti-DAXX antibody evidenced co-precipitation of the precursor and mature (M)  
407 forms of SREBP2 (Figure 4A). Using Proximity Ligation Assay (PLA) with a mouse monoclonal  
408 anti-DAXX and a rabbit polyclonal anti-SREBP2 antibody, endogenous DAXX-SREBP2  
409 interaction signals were detected in both the cytoplasm and the nucleus of the MDA-MB-231 cells

410 (Figure. 4B). Interestingly, the number of DAXX/SREBP2 PLA signals was significantly increased  
411 in the absence of serum (Figure 4B). The number of PLA signal dots were shown to be  
412 proportional to cellular protein levels (31). Thus, low extracellular supply of lipids appeared to  
413 enhance the DAXX-SREBP2 interaction.

414

415 Likewise, DAXX interacted with both the precursor and mature forms of SREBP1 in MDA-MB-231  
416 cells (Figure 4E and F). To assess the interaction between DAXX and mature SREBP1, we  
417 conducted co-IP using nuclear and cytoplasmic fractions of the MDA-MB-231 cells. As expected,  
418 the mature SREBP1 was predominantly detected in the nucleus (Figure 4F). Notably, mature  
419 SREBP1 was enriched in the DAXX immunoprecipitates of both fractions (Figure 4F). The DAXX-  
420 SREBP1 interaction signals were also detected in MDA-MB-231 cells using PLA (Figure 4G).  
421 Similar to the DAXX-SREBP2 interaction (Figure 4B), the number of DAXX-SREBP1 PLA foci  
422 was increased in the absence of serum (Figure 4G). Altogether, these data show that DAXX  
423 binds to both precursor and mature SREBP1/2.

424

425 Using various DAXX deletion constructs in transfected 293T cells, we found that the mature  
426 SREBP2 interacted with two separate regions of DAXX, the N-terminal part encompassing the  
427 well-folded helical bundle domain termed 4HB (DAXX helical bundle) (47) and a part of the central  
428 histone-binding domain (HBD) (24) (Figure 4C and D). Interestingly, although 4HB and HBD  
429 individually bound robustly to SREBP2 (Figure 4C lanes 3 and 4; Figure 4D lanes 1 and 3), the  
430 integrity of both binding sites in the context of the full-length DAXX or a longer construct appeared  
431 critical for the DAXX-mature SREBP2 interaction. Indeed, mutations within 4HB (I127A, del 129-  
432 132) (Figure 4C, lane 5) or HBD (del 327-335, Figure 4C lane 6; del 191-242, Figure 4C lane 7)  
433 abolished the DAXX-SREBP2 interaction. Notably, the DAXX construct (aa 1-437) lacking the  
434 sequence from the acidic domain to the C-terminus seemed to show higher affinity to SERBP2  
435 (Figure 4C lane 8). As deletions of C-terminal regions of DAXX did not affect the DAXX-SREBP2

436 interaction (Figure 4C and D) and C-terminal fragments spanning aa 574-740 did not bind to  
437 SREBP2 (data not shown), we concluded that SREBP2 does not bind to the C-terminal domain  
438 of DAXX. The mature SREBP1a bound to DAXX in a similar fashion (Figure 4H). Collectively,  
439 our data demonstrate that the mature SREBP1/2 specifically interact with DAXX via DAXX's 4HB  
440 and HBD (Figure 4I).

441

#### 442 **SREBP-binding sites are enriched in DAXX-associated chromatin**

443 The data presented above suggest that DAXX promotes SREBP-mediated transcription to  
444 stimulate lipogenesis. To test this idea, we conducted luciferase reporter assays. As shown in  
445 Figure 5A, forced expression of mature SREBP2, SREBP1a and SREBP1c increased the activity  
446 of the luciferase reporter that is under the control of the *SREBF2* promoter containing a canonical  
447 *SRE*. Co-expression of DAXX further increased the luciferase activity, while DAXX alone had only  
448 minimal effects (Figure 5A).

449

450 We surveyed genome-wide occupancy of DAXX using the ChIP-seq technology. Overexpression  
451 of WT DAXX increased DAXX's chromatin association (Figure 5B). Consistent with other studies  
452 (42), DAXX primarily bound to sites in introns and intergenic regions with less frequent association  
453 with promoters (Figure 5C). A de novo motif analysis revealed that SREBP-binding elements were  
454 significantly enriched in DAXX-associated sites (Figure 5D and Supplementary Figure S7).

455

456 ChIP-qPCR experiments demonstrated that WT DAXX was enriched in the promoters of *FASN*,  
457 *ACACA* and *SREBF2* (Figure 5E). In MDA-MB-231 cells depleted of SREBP2, DAXX's  
458 recruitment to the promoters of *FASN*, *ACACA* and *SREBP2* was impaired (Figure 5F),  
459 demonstrating that SREBP2 is critical for DAXX to bind the promoters of lipogenic genes.  
460 Likewise, DAXX recruitment to the promoters of lipogenesis genes were impaired in MDA-MB-

461 231 cells depleted of SREBP1 (Data not shown). Altogether, these data demonstrating that  
462 SREBPs are critical for DAXX to bind the promoters of lipogenic genes.

463

#### 464 **The DAXX-SREBP axis is important for lipogenesis and tumor growth**

465 SREBP1/2 drive lipid biosynthesis to promote tumorigenesis (4,46). In MDA-MB-231 cells,  
466 SREBP2 knockdown reduced de novo lipogenesis from acetate and tumor growth in vivo (Figure  
467 6A and E), whereas the overexpression of mature SREBP2 increased lipogenesis and tumor  
468 growth (Figure 6A and E). Concordantly, lipidomic profiling shows that SREBP2 knockdown had  
469 a marked impact on global lipid landscapes (Figure 6B-D). Likewise, SREBP1 knockdown (or  
470 overexpression) impaired (or promoted) de novo lipogenesis and tumor growth, respectively (data  
471 not shown). SREBP1 knockdown also significantly altered intracellular lipidome (Supplementary  
472 Figure 8). These data indicate both SREBP1 and SREBP2 are critical mediators of lipogenesis  
473 and tumorigenesis in TNBC models. Our data presented above demonstrated that the DAXX-  
474 SREBP interactions are critical for lipogenic gene expression, de novo lipogenesis and tumor  
475 growth. To further link SREBP2 to DAXX-mediated tumorigenesis, we depleted SREBP2 in MDA-  
476 MB-231 cells with WT DAXX OE. We observed that SREBP2 knockdown in the DAXX OE cells  
477 significantly attenuated the levels of lipogenic enzymes and tumor growth (Figure 6F and G),  
478 suggesting that SREBP2 is a critical effector of DAXX's oncogenic function.

479

480 To further assess the importance of the DAXX-SREBP interaction on lipogenesis, we  
481 overexpressed a DAXX mutant (del 327-335) defective of SREBP1 or SREBP2 binding (Figure  
482 4C and H) in MDA-MB-231 cells. The protein levels of both WT DAXX and the del 327-335 mutant  
483 were similar (Figure 7A and B). A de novo lipogenesis assay using [<sup>14</sup>C]-acetate labeling indicated  
484 that the del 327-331 mutant attenuated lipogenesis (Figure 7C). Lipidomic profiling revealed that  
485 MDA-MB-231 cells expressing the del 327-335 mutant has a distinct global lipid profile from that  
486 of cells expressing the WT DAXX (Figure 7D and E) and that this mutant was impaired to enhance

487 lipid production including glycerolipids and glycerophospholipids as compared to WT DAXX  
488 (Figure 7F and G). Reduced levels of specific lipid molecules such as cholesterol and fatty acid  
489 derivatives were evident in MDA-MB-231 cells expressing the del 327-331 mutant compared to  
490 those expressing the WT DAXX (Figure 7H). In vivo, the growth of xenograft tumors derived from  
491 cells expressing the del 327-335 mutant was markedly slower than that derived from cells with  
492 WT DAXX (Figure 7I). These data collectively indicate that the DAXX-SREBP interaction is critical  
493 for DAXX to promote lipogenesis and tumorigenesis (Figure 7J).

494

## 495 **DISCUSSION**

496 Lipid availability for proliferating cells determines activity of intracellular lipid biosynthesis pathway.  
497 In a nutrient-poor tumor microenvironment, limited supplies of lipids necessitate the activation of  
498 intracellular lipid production in tumor cells for sustained tumor growth. An elaborate sterol sensing  
499 machinery controls nuclear translocation of SREBP1/2, which promote expression of enzymes  
500 required for de novo lipogenesis (1,48). SREBP1/2 in conjunction with other transcription factors,  
501 such as the *E*-box-binding basic helix-loop-helix (bHLH) transcription factor USF1, activate  
502 expression of lipogenic enzymes and regulators (41). Other coregulators of gene expression  
503 such as acetyltransferases (e.g., p300 and PCAF) as well as oncogenic signaling pathways (e.g.,  
504 KRAS and mTOR) also play important roles in stimulating de novo lipogenesis (6,49). We  
505 demonstrated here that DAXX is important for de novo lipogenesis. Mechanistically, DAXX  
506 interacts with SREBP1/2 and is enriched in chromatin containing *SRE* motifs. Importantly, the  
507 DAXX del 327-335 mutant that cannot bind SREBP1/2 were unable to promote lipogenesis and  
508 tumor growth. SREBP2 downregulation prevents enhanced tumor growth by DAXX  
509 overexpression. Thus, it is likely that DAXX enhances lipogenesis through interacting with  
510 SREBP1/2 to promote lipogenic gene expression, lipid production and tumorigenesis.

511

512 Our data suggest that DAXX acts to promote SREBP-mediated transcription. It has been well

513 documented that DAXX can activate and repress transcription, depending on co-regulators that  
514 are associated with DAXX (18). Epigenetic modifiers such as HDACs and DNA and histone  
515 methyltransferases are involved in DAXX-mediated transcription repression, while coactivators  
516 (e.g., CBP) are involved in DAXX-mediated gene activation. The H3.3 histone chaperone function  
517 of DAXX is also implicated in both transcriptional activation (50,51) and repression (52,53).  
518 Independently of H3.3 deposition by DAXX to chromatin, the H3.3/H4 dimer metabolically  
519 stabilizes DAXX protein, which indirectly enhances repression of endogenous retroviruses by a  
520 complex consisting of the DAXX-H3.3/H4 sub-complex, HDAC1, KAP1, and SETDB1 (44). Our  
521 data show that SREBP1/2 bind to DAXX by contacting with both 4HB and HBD (Figure 4). A  
522 previous structural study demonstrates that a peptide within the transactivation domain of p53  
523 binds to DAXX 4HB (47). It will be interesting to assess whether DAXX also engages the  
524 transactivation domain of SREBPs to promote transcription and whether the H3.3 chaperone  
525 function of DAXX is important for lipogenic gene expression.

526

527 Of note, the binding motifs of other known DAXX-binding transcription factors such as NF- $\kappa$ B (20)  
528 were highly enriched in DAXX ChIP-seq peaks (Figure 5D). Our ChIP-seq data also implicate  
529 the chromatin recruitment of DAXX by other transcription factors such as RUNX1, RUNX2, HIC1  
530 and c-MYC that were not previously shown to interact with DAXX. Furthermore, DAXX might  
531 interact with the core-transcriptional machinery, as the TATA-box and DCE (downstream core  
532 element) were enriched in DAXX-binding chromatins (Figure 5D and Supplementary Figure S7).  
533 These observations suggest a broader role for DAXX in transcription regulation.

534

535 Based on our co-immunoprecipitation and PLA results, DAXX appears to interact with SREBP1/2  
536 in both the cytoplasm and the nucleus (Figure 4). Interestingly, the number of DAXX-SREBP1/2  
537 PLA complexes increases upon serum starvation (Figure 4), suggesting that a low level of lipid

538 supply might trigger the formation of the DAXX-SREBP1/2 complexes in the cytoplasm. In the  
539 nucleus, the DAXX-SREBP interactions are expected to mediate DAXX's chromatin recruitment  
540 and the activation of lipogenic gene expression. The functional effects of DAXX-SREBP  
541 interactions in the cytoplasm are currently unknown. In the cytoplasm, DAXX has been shown to  
542 interact with regulators of cell death and cell survival (18). A recent study demonstrates that  
543 DAXX promotes the formation of SQSTM1/p62 membrane-less liquid compartments to activate  
544 cellular anti-oxidative stress response (54). The functional ramification of the interaction between  
545 DAXX and SREBPs in the cytoplasm requires further investigation.

546

547 Targeting the de novo lipogenesis pathways such as the biosynthesis of fatty acids (1) and  
548 cholesterol (55,56) is a promising approach for treating BC and other cancer types. Our data  
549 show that the DAXX-SREBP axis appears to play a critical role in promoting lipid production and  
550 tumor growth. The specific binding interactions between DAXX and SREBP1/2 could be potential  
551 therapeutic targets for anticancer drug development. It will be interesting to define precisely the  
552 interfaces between DAXX and SREBPs and to determine whether these interfaces are tractable  
553 as therapeutic targets.

554

555

556 **ACKNOWLEDGEMENTS**

557 We thank Yue Li for help with initial microarray data analysis, Maria Zajac-Kaye, Shuang Huang  
558 and Scott Dehm for providing reagents. We also thank Subramaniam Shyamalagovindarajan and  
559 Ranjan Perera for library construction and high throughput sequencing for the ChIP-seq  
560 experiments.

561

562 *Author contributions:* I.M. designed, and performed experiments, analyzed and interpreted data,  
563 and contributed to writing; G.T., J.W., J.L., A.W., M.L.L., L.Y.Z., and H.T.P. conducted  
564 experiments, acquired and analyzed data; J.J.L. performed IPA analysis; T.G. supervised mass  
565 spectrometry experiments; Z.H. conducted bioinformatics analysis. Y.D. analyzed and interpreted  
566 data and contributed to writing; D.L. designed and conducted experiments, analyzed and  
567 interpreted data, supervised the entire study, and wrote the paper.

568

569 **FUNDING**

570 This work was supported by grants from Bankhead-Coley Cancer Research Program (4BF02 and  
571 6BC03), and James and Esther King Biomedical Research Program (6JK03 and 20K07), Florida  
572 Department of Health, Florida Breast Cancer Foundation, and UF Health Cancer Center (to D.  
573 Liao). Mass spectrometry-based global lipidomics work was supported by grant from National  
574 Institutes of Health (U24DK097209 to T.G.). J. Li was supported by the Intramural Research  
575 Program of the NIH, National Institute of Environmental Health Sciences. The high throughput  
576 sequencing of the ChIP-seq experiments was supported by a grant from Bankhead-Coley Cancer  
577 Research Program, Florida Department of Health (5BC08 to Ranjan Perera).

578

579 **Competing interests:** A US patent application related to this study has been filed on behalf of  
580 the University of Florida Research Foundation.



581  
582 **REFERENCES**

- 583  
584 1. Rohrig, F. and Schulze, A. (2016) The multifaceted roles of fatty acid synthesis in cancer.  
585 *Nat Rev Cancer*, **16**, 732-749.
- 586 2. Beloribi-Djefaflija, S., Vasseur, S. and Guillaumond, F. (2016) Lipid metabolic  
587 reprogramming in cancer cells. *Oncogenesis*, **5**, e189.
- 588 3. Lewis, C.A., Brault, C., Peck, B., Bensaad, K., Griffiths, B., Mitter, R., Chakravarty, P., East,  
589 P., Dankworth, B., Alibhai, D. *et al.* (2015) SREBP maintains lipid biosynthesis and  
590 viability of cancer cells under lipid- and oxygen-deprived conditions and defines a gene  
591 signature associated with poor survival in glioblastoma multiforme. *Oncogene*, **34**, 5128-  
592 5140.
- 593 4. Griffiths, B., Lewis, C.A., Bensaad, K., Ros, S., Zhang, Q., Ferber, E.C., Konisti, S., Peck, B.,  
594 Miess, H., East, P. *et al.* (2013) Sterol regulatory element binding protein-dependent  
595 regulation of lipid synthesis supports cell survival and tumor growth. *Cancer Metab*, **1**, 3.
- 596 5. Guo, D., Prins, R.M., Dang, J., Kuga, D., Iwanami, A., Soto, H., Lin, K.Y., Huang, T.T.,  
597 Akhavan, D., Hock, M.B. *et al.* (2009) EGFR signaling through an Akt-SREBP-1-dependent,  
598 rapamycin-resistant pathway sensitizes glioblastomas to antilipogenic therapy. *Sci*  
599 *Signal*, **2**, ra82.
- 600 6. Ricoult, S.J., Yecies, J.L., Ben-Sahra, I. and Manning, B.D. (2016) Oncogenic PI3K and K-  
601 Ras stimulate de novo lipid synthesis through mTORC1 and SREBP. *Oncogene*, **35**, 1250-  
602 1260.
- 603 7. Saxton, R.A. and Sabatini, D.M. (2017) mTOR Signaling in Growth, Metabolism, and  
604 Disease. *Cell*, **168**, 960-976.
- 605 8. Duvel, K., Yecies, J.L., Menon, S., Raman, P., Lipovsky, A.I., Souza, A.L., Triantafellow, E.,  
606 Ma, Q., Gorski, R., Cleaver, S. *et al.* (2010) Activation of a metabolic gene regulatory  
607 network downstream of mTOR complex 1. *Mol Cell*, **39**, 171-183.
- 608 9. Peterson, T.R., Sengupta, S.S., Harris, T.E., Carmack, A.E., Kang, S.A., Balderas, E.,  
609 Guertin, D.A., Madden, K.L., Carpenter, A.E., Finck, B.N. *et al.* (2011) mTOR complex 1  
610 regulates lipin 1 localization to control the SREBP pathway. *Cell*, **146**, 408-420.
- 611 10. Sundqvist, A., Bengoechea-Alonso, M.T., Ye, X., Lukiyanchuk, V., Jin, J., Harper, J.W. and  
612 Ericsson, J. (2005) Control of lipid metabolism by phosphorylation-dependent  
613 degradation of the SREBP family of transcription factors by SCF(Fbw7). *Cell Metab*, **1**,  
614 379-391.
- 615 11. Welcker, M., Larimore, E.A., Swanger, J., Bengoechea-Alonso, M.T., Grim, J.E., Ericsson,  
616 J., Zheng, N. and Clurman, B.E. (2013) Fbw7 dimerization determines the specificity and  
617 robustness of substrate degradation. *Genes Dev*, **27**, 2531-2536.
- 618 12. Li, S., Oh, Y.T., Yue, P., Khuri, F.R. and Sun, S.Y. (2016) Inhibition of mTOR complex 2  
619 induces GSK3/FBXW7-dependent degradation of sterol regulatory element-binding  
620 protein 1 (SREBP1) and suppresses lipogenesis in cancer cells. *Oncogene*, **35**, 642-650.
- 621 13. Comerford, S.A., Huang, Z., Du, X., Wang, Y., Cai, L., Witkiewicz, A.K., Walters, H.,  
622 Tantawy, M.N., Fu, A., Manning, H.C. *et al.* (2014) Acetate dependence of tumors. *Cell*,  
623 **159**, 1591-1602.

- 624 14. Bulusu, V., Tumanov, S., Michalopoulou, E., van den Broek, N.J., MacKay, G., Nixon, C.,  
625 Dhayade, S., Schug, Z.T., Vande Voorde, J., Blyth, K. *et al.* (2017) Acetate Recapturing by  
626 Nuclear Acetyl-CoA Synthetase 2 Prevents Loss of Histone Acetylation during Oxygen  
627 and Serum Limitation. *Cell Rep*, **18**, 647-658.
- 628 15. Gao, X., Lin, S.H., Ren, F., Li, J.T., Chen, J.J., Yao, C.B., Yang, H.B., Jiang, S.X., Yan, G.Q.,  
629 Wang, D. *et al.* (2016) Acetate functions as an epigenetic metabolite to promote lipid  
630 synthesis under hypoxia. *Nat Commun*, **7**, 11960.
- 631 16. Yang, X.L., Khosravi-Far, R., Chang, H.Y. and Baltimore, D. (1997) Daxx, a novel Fas-  
632 binding protein that activates JNK and apoptosis. *Cell*, **89**, 1067-1076.
- 633 17. Michaelson, J.S., Bader, D., Kuo, F., Kozak, C. and Leder, P. (1999) Loss of Daxx, a  
634 promiscuously interacting protein, results in extensive apoptosis in early mouse  
635 development. *Genes Dev*, **13**, 1918-1923.
- 636 18. Mahmud, I. and Liao, D. (2019) DAXX in cancer: phenomena, processes, mechanisms  
637 and regulation. *Nucleic Acids Res*, **47**, 7734-7752.
- 638 19. Zhao, L.Y., Liu, J., Sidhu, G.S., Niu, Y., Liu, Y., Wang, R. and Liao, D. (2004) Negative  
639 regulation of p53 functions by Daxx and the involvement of MDM2. *J Biol Chem*, **279**,  
640 50566-50579.
- 641 20. Puto, L.A. and Reed, J.C. (2008) Daxx represses RelB target promoters via DNA  
642 methyltransferase recruitment and DNA hypermethylation. *Genes Dev*, **22**, 998-1010.
- 643 21. Lewis, P.W., Elsaesser, S.J., Noh, K.M., Stadler, S.C. and Allis, C.D. (2010) Daxx is an H3.3-  
644 specific histone chaperone and cooperates with ATRX in replication-independent  
645 chromatin assembly at telomeres. *Proc Natl Acad Sci U S A*, **107**, 14075-14080.
- 646 22. Goldberg, A.D., Banaszynski, L.A., Noh, K.M., Lewis, P.W., Elsaesser, S.J., Stadler, S.,  
647 Dewell, S., Law, M., Guo, X., Li, X. *et al.* (2010) Distinct factors control histone variant  
648 H3.3 localization at specific genomic regions. *Cell*, **140**, 678-691.
- 649 23. Drane, P., Ouararhni, K., Depaux, A., Shuaib, M. and Hamiche, A. (2010) The death-  
650 associated protein DAXX is a novel histone chaperone involved in the replication-  
651 independent deposition of H3.3. *Genes Dev*, **24**, 1253-1265.
- 652 24. Elsasser, S.J., Huang, H., Lewis, P.W., Chin, J.W., Allis, C.D. and Patel, D.J. (2012) DAXX  
653 envelops a histone H3.3-H4 dimer for H3.3-specific recognition. *Nature*, **491**, 560-565.
- 654 25. Liu, C.P., Xiong, C., Wang, M., Yu, Z., Yang, N., Chen, P., Zhang, Z., Li, G. and Xu, R.M.  
655 (2012) Structure of the variant histone H3.3-H4 heterodimer in complex with its  
656 chaperone DAXX. *Nat Struct Mol Biol*, **19**, 1287-1292.
- 657 26. Pan, W.W., Zhou, J.J., Liu, X.M., Xu, Y., Guo, L.J., Yu, C., Shi, Q.H. and Fan, H.Y. (2013)  
658 Death domain-associated protein DAXX promotes ovarian cancer development and  
659 chemoresistance. *J Biol Chem*, **288**, 13620-13630.
- 660 27. Puto, L.A., Brognard, J. and Hunter, T. (2015) Transcriptional Repressor DAXX Promotes  
661 Prostate Cancer Tumorigenicity via Suppression of Autophagy. *J Biol Chem*, **290**, 15406-  
662 15420.
- 663 28. Benitez, J.A., Ma, J., D'Antonio, M., Boyer, A., Camargo, M.F., Zanca, C., Kelly, S.,  
664 Khodadadi-Jamayran, A., Jameson, N.M., Andersen, M. *et al.* (2017) PTEN regulates  
665 glioblastoma oncogenesis through chromatin-associated complexes of DAXX and  
666 histone H3.3. *Nat Commun*, **8**, 15223.

- 667 29. Wang, Y., Stowe, R.L., Pinello, C.E., Tian, G., Madoux, F., Li, D., Zhao, L.Y., Li, J.L., Wang,  
668 Y., Wang, Y. *et al.* (2015) Identification of Histone Deacetylase Inhibitors with  
669 Benzoylhydrazide Scaffold that Selectively Inhibit Class I Histone Deacetylases. *Chem*  
670 *Biol*, **22**, 273-284.
- 671 30. Mahmud, I. and Liao, D. (2015) Microarray gene expression profiling reveals potential  
672 mechanisms of tumor suppression by the class I HDAC-selective benzoylhydrazide  
673 inhibitors. *Genom Data*, **5**, 257-259.
- 674 31. Bunse, L., Schumacher, T., Sahm, F., Pusch, S., Oezen, I., Rauschenbach, K., Gonzalez, M.,  
675 Solecki, G., Osswald, M., Capper, D. *et al.* (2015) Proximity ligation assay evaluates  
676 IDH1R132H presentation in gliomas. *J Clin Invest*, **125**, 593-606.
- 677 32. Waddell, A.R. and Liao, D. (2020) Assays for Validating Histone Acetyltransferase  
678 Inhibitors. *J Vis Exp*, e61289.
- 679 33. Subramanian, A., Tamayo, P., Mootha, V.K., Mukherjee, S., Ebert, B.L., Gillette, M.A.,  
680 Paulovich, A., Pomeroy, S.L., Golub, T.R., Lander, E.S. *et al.* (2005) Gene set enrichment  
681 analysis: a knowledge-based approach for interpreting genome-wide expression  
682 profiles. *Proc Natl Acad Sci U S A*, **102**, 15545-15550.
- 683 34. Pertea, M., Kim, D., Pertea, G.M., Leek, J.T. and Salzberg, S.L. (2016) Transcript-level  
684 expression analysis of RNA-seq experiments with HISAT, StringTie and Ballgown. *Nat*  
685 *Protoc*, **11**, 1650-1667.
- 686 35. Kim, D., Langmead, B. and Salzberg, S.L. (2015) HISAT: a fast spliced aligner with low  
687 memory requirements. *Nat Methods*, **12**, 357-360.
- 688 36. Pertea, M., Pertea, G.M., Antonescu, C.M., Chang, T.C., Mendell, J.T. and Salzberg, S.L.  
689 (2015) StringTie enables improved reconstruction of a transcriptome from RNA-seq  
690 reads. *Nat Biotechnol*, **33**, 290-295.
- 691 37. Frazee, A.C., Pertea, G., Jaffe, A.E., Langmead, B., Salzberg, S.L. and Leek, J.T. (2015)  
692 Ballgown bridges the gap between transcriptome assembly and expression analysis. *Nat*  
693 *Biotechnol*, **33**, 243-246.
- 694 38. Smyth, G.K. (2004) Linear models and empirical bayes methods for assessing differential  
695 expression in microarray experiments. *Stat Appl Genet Mol Biol*, **3**, Article3.
- 696 39. Langmead, B. and Salzberg, S.L. (2012) Fast gapped-read alignment with Bowtie 2. *Nat*  
697 *Methods*, **9**, 357-359.
- 698 40. Heinz, S., Benner, C., Spann, N., Bertolino, E., Lin, Y.C., Laslo, P., Cheng, J.X., Murre, C.,  
699 Singh, H. and Glass, C.K. (2010) Simple combinations of lineage-determining  
700 transcription factors prime cis-regulatory elements required for macrophage and B cell  
701 identities. *Mol Cell*, **38**, 576-589.
- 702 41. Wang, Y., Viscarra, J., Kim, S.J. and Sul, H.S. (2015) Transcriptional regulation of hepatic  
703 lipogenesis. *Nat Rev Mol Cell Biol*, **16**, 678-689.
- 704 42. Puto, L.A., Benner, C. and Hunter, T. (2015) The DAXX co-repressor is directly recruited  
705 to active regulatory elements genome-wide to regulate autophagy programs in a model  
706 of human prostate cancer. *Oncoscience*, **2**, 362-372.
- 707 43. Horton, J.D., Shah, N.A., Warrington, J.A., Anderson, N.N., Park, S.W., Brown, M.S. and  
708 Goldstein, J.L. (2003) Combined analysis of oligonucleotide microarray data from  
709 transgenic and knockout mice identifies direct SREBP target genes. *Proc Natl Acad Sci U*  
710 *S A*, **100**, 12027-12032.

- 711 44. Hoelper, D., Huang, H., Jain, A.Y., Patel, D.J. and Lewis, P.W. (2017) Structural and  
712 mechanistic insights into ATRX-dependent and -independent functions of the histone  
713 chaperone DAXX. *Nat Commun*, **8**, 1193.
- 714 45. Currie, E., Schulze, A., Zechner, R., Walther, T.C. and Farese, R.V., Jr. (2013) Cellular fatty  
715 acid metabolism and cancer. *Cell Metab*, **18**, 153-161.
- 716 46. Moon, S.H., Huang, C.H., Houlihan, S.L., Regunath, K., Freed-Pastor, W.A., Morris, J.P.t.,  
717 Tschaharganeh, D.F., Kasthuber, E.R., Barsotti, A.M., Culp-Hill, R. *et al.* (2019) p53  
718 Represses the Mevalonate Pathway to Mediate Tumor Suppression. *Cell*, **176**, 564-580  
719 e519.
- 720 47. Escobar-Cabrera, E., Lau, D.K., Giovinazzi, S., Ishov, A.M. and McIntosh, L.P. (2010)  
721 Structural characterization of the DAXX N-terminal helical bundle domain and its  
722 complex with Rassf1C. *Structure*, **18**, 1642-1653.
- 723 48. Bengoechea-Alonso, M.T. and Ericsson, J. (2007) SREBP in signal transduction:  
724 cholesterol metabolism and beyond. *Curr Opin Cell Biol*, **19**, 215-222.
- 725 49. Porstmann, T., Santos, C.R., Griffiths, B., Cully, M., Wu, M., Leever, S., Griffiths, J.R.,  
726 Chung, Y.L. and Schulze, A. (2008) SREBP activity is regulated by mTORC1 and  
727 contributes to Akt-dependent cell growth. *Cell Metab*, **8**, 224-236.
- 728 50. Michod, D., Bartsaghi, S., Khelifi, A., Bellodi, C., Berliocchi, L., Nicotera, P. and  
729 Salomoni, P. (2012) Calcium-dependent dephosphorylation of the histone chaperone  
730 DAXX regulates H3.3 loading and transcription upon neuronal activation. *Neuron*, **74**,  
731 122-135.
- 732 51. Martire, S., Gogate, A.A., Whitmill, A., Tafessu, A., Nguyen, J., Teng, Y.C., Tastemel, M.  
733 and Banaszynski, L.A. (2019) Phosphorylation of histone H3.3 at serine 31 promotes  
734 p300 activity and enhancer acetylation. *Nat Genet*, **51**, 941-946.
- 735 52. Elsasser, S.J., Noh, K.M., Diaz, N., Allis, C.D. and Banaszynski, L.A. (2015) Histone H3.3 is  
736 required for endogenous retroviral element silencing in embryonic stem cells. *Nature*,  
737 **522**, 240-244.
- 738 53. He, Q., Kim, H., Huang, R., Lu, W., Tang, M., Shi, F., Yang, D., Zhang, X., Huang, J., Liu, D.  
739 *et al.* (2015) The Daxx/Atrx Complex Protects Tandem Repetitive Elements during DNA  
740 Hypomethylation by Promoting H3K9 Trimethylation. *Cell Stem Cell*, **17**, 273-286.
- 741 54. Yang, Y., Willis, T.L., Button, R.W., Strang, C.J., Fu, Y., Wen, X., Grayson, P.R.C., Evans, T.,  
742 Siphthorpe, R.J., Roberts, S.L. *et al.* (2019) Cytoplasmic DAXX drives SQSTM1/p62 phase  
743 condensation to activate Nrf2-mediated stress response. *Nat Commun*, **10**, 3759.
- 744 55. Mullen, P.J., Yu, R., Longo, J., Archer, M.C. and Penn, L.Z. (2016) The interplay between  
745 cell signalling and the mevalonate pathway in cancer. *Nat Rev Cancer*, **16**, 718-731.
- 746 56. Riscal, R., Skuli, N. and Simon, M.C. (2019) Even Cancer Cells Watch Their Cholesterol!  
747 *Mol Cell*, **76**, 220-231.
- 748

749

750 **Figure legends**

751

752 **Figure 1.** DAXX is upregulated in BC and transcriptomic profiling identifies a functional role for  
753 DAXX in lipid metabolism. **(A)** Upregulation of DAXX mRNA expression in three major BC  
754 subtypes compared to normal controls based on a TCGA dataset. **(B)** Increased DAXX protein  
755 levels in three major BC subtypes compared to normal controls based on a CPTAC dataset. **(C)**  
756 Validation of shRNA-mediated DAXX knockdown (KD) and the overexpression of WT DAXX  
757 cDNA (OE) compared to cells with a control vector (CTL) in MDA-MB-231 cells by immunoblotting.  
758 **(D)** Principal component analysis comparing transcriptomes of CTL, DAXX KD, and WT DAXX  
759 OE cells. Each dot represents a sample. **(E)** Hierarchical clustering heatmap analysis of  
760 differentially expressed genes showing 30 most differentially expressed genes. **(F)** Top 10  
761 pathways identified using IPA as downregulated in DAXX KD but upregulated in DAXX OE cells.  
762 **(G)** A heatmap of relative mRNA levels of DAXX along with select genes in the lipid metabolism  
763 pathways. The red and blue groups refer to a high (red) or low level (blue) of mRNA expression  
764 of the indicated genes according to combined expression scores in an individual tumor sample  
765 from a TCGA BC dataset. **(H)** A Kaplan-Meier plot of the correlation between gene expression  
766 levels of the select genes in panel **G** (the red and blue groups) and patient survival time.

767

768 **Figure 2.** DAXX promotes lipogenesis in cancer cells. **(A)** Principal component analysis  
769 comparing lipidomes of MDA-MB-231 cells (CTL, DAXX KD and OE). Each dot represents a  
770 sample (n=6). **(B)** Hierarchical clustering heatmap analysis of the 60 most differentially expressed  
771 lipid molecules in CTL, KD and OE MDA-MB-231 cells. **(C)** Significantly altered lipid pathways in  
772 MDA-MB-231 cells with DAXX OE that were identified using the KEGG pathway library with an  
773 FDR <0.05 and a pathway impact >0.5. The color and size of the circle denote p value and  
774 pathway impact respectively. The largest red circle indicates the most significantly affected  
775 pathway. **(D)** An immunoblotting analysis of MDA-MB-468 cells with a control vector (CTL), DAXX

776 shRNA (KD), and DAXX cDNA (OE). (E) Principal component analysis of lipidomes of CTL, KD  
777 and OE MDA-MB-468 cells. Each dot represents a sample (n=4). (F) Hierarchical clustering  
778 heatmap analysis of top differentially changed lipid molecules in MDA-MB-468 cells. (G)  
779 Significantly altered lipid pathways in MDA-MB-468 DAXX OE cells based on lipidome as in panel  
780 C. The top 4 most altered pathways are labelled. (H) Impact of DAXX expression levels on  
781 acetate-dependent de novo lipid synthesis using [<sup>14</sup>C]-acetate labeling in the absence of serum  
782 in the indicated cell lines with different levels of DAXX expression (CTL, KD or OE).

783

784 **Figure 3.** DAXX promotes tumor growth in vivo. (A and B) Cell lines derived from MDA-MB-231  
785 or MDA-MB-468 stably transduced with a control vector (Control, CTL), DAXX shRNA (KD), or  
786 WT DAXX cDNA (OE) were implanted into mammary fat pads of female NSG mice. Longitudinal  
787 tumor volumes are plotted. Tumor images and weights at the endpoint are shown. (C) DAXX KD  
788 and overexpression were maintained in vivo. Protein extracts from three representative xenograft  
789 tumors were analyzed for DAXX protein levels using immunoblotting. HSP60 was detected as a  
790 loading control. (D) Hierarchical clustering heatmap analysis of top glycerophospholipid  
791 molecules that were differentially produced in MDA-MB-231 xenograft tumors with different levels  
792 of DAXX. (E) Multivariate PCA of lipids shows distinct global lipid profiles in xenograft tumors  
793 derived from control (red dots), DAXX KD (green dots), and OE (blue dots) MDA-MB-231 cells.  
794 (F) Relative abundance of total triglycerides, cholesterol and derivatives in xenograft tumors  
795 derived from MDA-MB-231 cell line panel as in (A). Box plots of the indicated lipid species are  
796 shown. The p values were calculated based on Student's t-test. \*: p < 0.05; \*\*: p < 0.01. 25/27-  
797 HC: 25- or 27-hydroxycholesterol.

798

799 **Figure 4** DAXX binds to SREBPs. (A) The endogenous DAXX and SREBP2 interact. MDA-MB-  
800 231 whole cell extracts were subjected to IP with a control (IgG) or an anti-DAXX antibody. The  
801 immunoprecipitated SREBP2 and DAXX were detected. (B) Representative images of Proximity

802 Ligation Assay (PLA) showing DAXX-SREBP2 interactions in MDA-MB-231 cells in the presence  
803 or absence of serum. (**C** and **D**) There are two independent binding sites in DAXX for mature  
804 SREBP2. 293T cells were cotransfected with FLAG-SREBP2m (mature) and GFP (control) or an  
805 indicated GFP-DAXX fusion construct. The cell lysates were subjected to anti-FLAG IP. Note  
806 that the DAXX amino acid (aa) 129-190 construct is not recognized by the antibody used for  
807 detecting DAXX in **C** (lane 2), which was detected with a GFP antibody (panel **D**, lane 2). The  
808 endogenous DAXX in the input samples is denoted with an arrow in **C**. In **D**, the arrow points to  
809 the GFP-DAXX 129-396 band, which accumulated at a relatively low level. HC: heavy chain. (**E**  
810 and **F**) The endogenous DAXX and SREBP1 interact. Total MDA-MB-231 cell extracts (**E**), the  
811 cytoplasmic (C) or nuclear fraction (N) were subjected to IP was in panel **A** and the co-precipitated  
812 SREBP1 and DAXX were detected. PCNA and HSP60 were detected as a marker of nuclear and  
813 cytoplasmic fraction respectively in panel **F**. (**G**) PLA images showing DAXX-SREBP1  
814 interactions in MDA-MB-231 cells in the presence or absence of serum as in panel **B**. (**H**)  
815 Cotransfection of FLAG-SREBP1a (mature) and the indicated GFP-DAXX fusion constructs, IP  
816 and immunoblotting experiments were performed as in **C**. (**I**) Schematic drawing of DAXX-  
817 SREBP interactions. The position of aa 327-335 within the DAXX HBD critical for the DAXX-  
818 SREBP interactions is indicated. SIM: SUMO-interacting motif; 4HB: DAXX helical bundle; HBD:  
819 histone-binding domain; PEST: proline, glutamic acid, serine, and threonine-rich sequence.  
820 Numbers refer to aa residue positions in the DAXX protein. In panel **C**, vertically sliced images  
821 from the same gel are juxtaposed as indicated.

822

823 **Figure 5.** DAXX activates SREBP-mediated transcription and occupies the promoters of lipogenic  
824 genes. (**A**) MDA-MB-231 cells were transfected with a luciferase reporter driven by a promoter  
825 fragment from the *SREBF2* gene along with mature SREBP2, SREBP1a, SREBP1c, or wt DAXX  
826 cDNA as indicated. Dual luciferase assays were done. (**B**) ChIP-seq signal intensity heat maps  
827 in MDA-MB-231 control and DAXX OE cell lines; signals are centralized to transcriptional start

828 sites (TSS). **(C)** The genome-wide distribution of DAXX chromatin occupancy. **(D)** Motifs  
829 enriched as determined by the DAXX CHIP-seq dataset of MDA-MB-231 DAXX OE cells. **(E)**  
830 MDA-MB-231 cells stably expressing WT DAXX were subjected to CHIP with a control IgG and  
831 an anti-DAXX antibody. The precipitated DNAs were subjected to qPCR with primers specific to  
832 promoter regions of the indicated genes. **(F)** SREBP2 is critical for DAXX to bind lipogenic gene  
833 promoters. MDA-MB-231 cells with a control vector or a SREBP2 shRNA vector were subjected  
834 to CHIP with a control IgG, or an anti-DAXX antibody followed by qPCR with primers specific to  
835 the indicated gene promoters.

836

837 **Figure 6.** SREBP2 knockdown impairs DAXX-mediated tumor growth. **(A)** Cells derived from  
838 MDA-MB-231 cell line with a vector for a control, an SREBF2 shRNA, or SREBP2 (mature) cDNA  
839 were subjected to RT-qPCR for assessing SREBP2 expression, and de novo lipogenesis assays  
840 using [<sup>14</sup>C] acetate. **(B)** PCA of lipidomes in shControl and shSREBP2 cells. Each dot represents  
841 a sample (n=4). **(C)** Hierarchical clustering heatmap analysis demonstrates global lipid landscape  
842 in shSREBP2 cells compared to shControl cells. **(D)** Hierarchical clustering heatmap analysis of  
843 lipids including glycerolipid and glycerophospholipid molecules that were highly downregulated in  
844 shSREBP2 cells compared to control cells. **(E)** MDA-MB-231-derived cells (Control, DAXX OE,  
845 SREBP2 shRNA and mature SREBP2 OE) were xenografted into mammary fat pads of female  
846 NSG mice. Tumor volumes were plotted against time. Representative images of dissected  
847 tumors are shown. The final tumor weights are plotted. **(F)** Control or SREBF2 shRNA were  
848 expressed in MDA-MB-231 cells with DAXX OE. The levels of the indicated proteins were  
849 assessed by immunoblotting. **(G)** The indicated cells shown in panel **F** were xenografted into  
850 mammary fat pads of female NSG mice. Tumor volumes were plotted against time.  
851 Representative images of dissected tumors are shown. The final tumor weights are plotted. The  
852 p values were calculated (vs. control) based on Student's t-test. \*: p < 0.05; \*\*: p < 0.01.

853



854 **Figure 7.** The DAXX-SREBP interaction is critical for lipogenesis and tumor growth. **(A)** Relative  
855 mRNA levels of DAXX in MDA-MB-231 cells expressing the WT or del 327-335 mutant cDNA of  
856 DAXX as determined by RT-qPCR. **(B)** Protein levels of DAXX in control cells and those with  
857 DAXX KD, WT and del 327-335 mutant cDNA of DAXX. **(C)** The DAXX del 327-337 mutant  
858 impaired de novo lipogenesis. Serum-starved cells were labeled with [<sup>14</sup>C] acetate and total lipids  
859 were isolated. Radioactivity was counted and normalized against total protein level. **(D)** PCA of  
860 lipidomes in MDA-MB-231 cells expressing the del327-335 mutant and WT DAXX. Each dot  
861 represents a sample (n=4). **(E)** Hierarchical clustering heatmap analysis of global lipidomes in  
862 cells expressing the del327-335 mutant and WT DAXX. **(F)** Hierarchical clustering heatmap  
863 analysis of glycerolipid molecules that were highly differentially expressed between MDA-MB-231  
864 cells with the del 327-335 mutant and wt DAXX. **(G)** Hierarchical clustering heatmap analysis of  
865 glycerophospholipid molecules that were highly differentially expressed between MDA-MB-231  
866 cells with the del 327-335 mutant and WT DAXX. **(H)** Bar graphs of relative normalized  
867 abundance of specific lipids in MDA-MB-231 cells expressing the del 327-335 mutant and WT  
868 DAXX. **(I)** MDA-MB-231 cells expressing the del 327-335 mutant and WT DAXX were  
869 xenografted into mammary fat pads of female NSG mice. Representative images of dissected  
870 tumors are shown. The final tumor weights are plotted. **(J)** A cartoon depicting the importance  
871 of DAXX-SREBP interaction for lipogenesis and tumorigenesis. The p values were calculated (vs.  
872 control) based on Student's t-test. \*: p < 0.05; \*\*: p < 0.01.

873

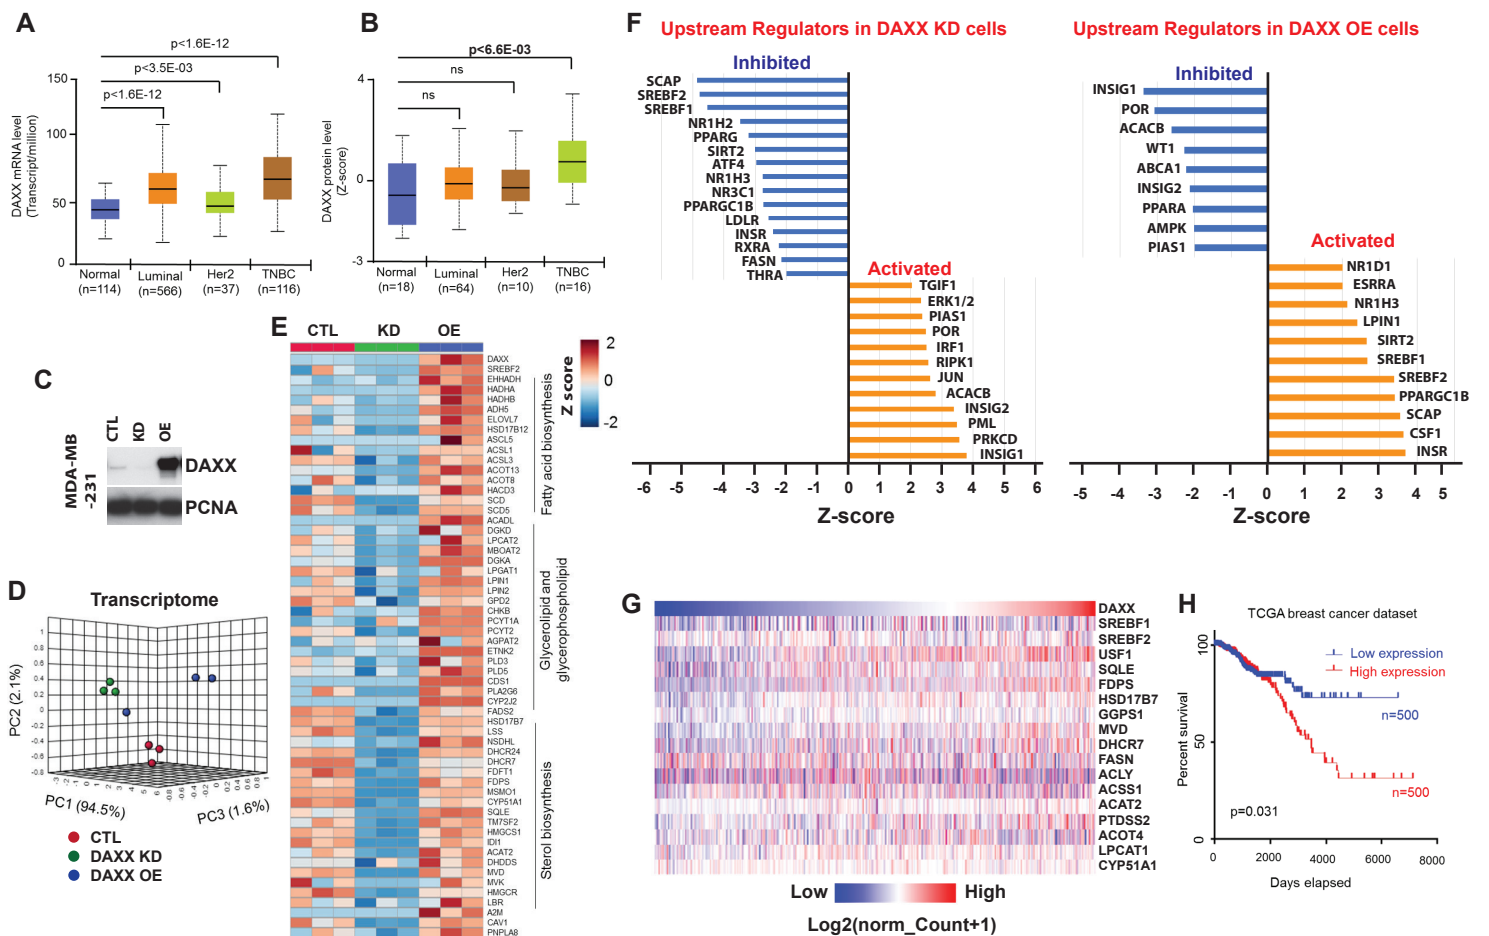

**Figure 1.** DAXX is upregulated in BC and transcriptomic profiling identifies a functional role for DAXX in lipid metabolism. **(A)** Upregulation of DAXX mRNA expression in three major BC subtypes compared to normal controls based on a TCGA dataset. **(B)** Increased DAXX protein levels in three major BC subtypes compared to normal controls based on a CPTAC dataset. **(C)** Validation of shRNA-mediated DAXX knockdown (KD) and the overexpression of WT DAXX cDNA (OE) compared to cells with a control vector (CTL) in MDA-MB-231 cells by immunoblotting. **(D)** Principal component analysis comparing transcriptomes of CTL, DAXX KD, and WT DAXX OE cells. Each dot represents a sample. **(E)** Hierarchical clustering heatmap analysis of differentially expressed genes showing 30 most differentially expressed genes. **(F)** Top 10 pathways identified using IPA as downregulated in DAXX KD but upregulated in DAXX OE cells. **(G)** A heatmap of relative mRNA levels of DAXX along with select genes in the lipid metabolism pathways. The red and blue groups refer to a high (red) or low level (blue) of mRNA expression of the indicated genes according to combined expression scores in an individual tumor sample from a TCGA BC dataset. **(H)** A Kaplan-Meier plot of the correlation between gene expression levels of the select genes in panel G (the red and blue groups) and patient survival time.

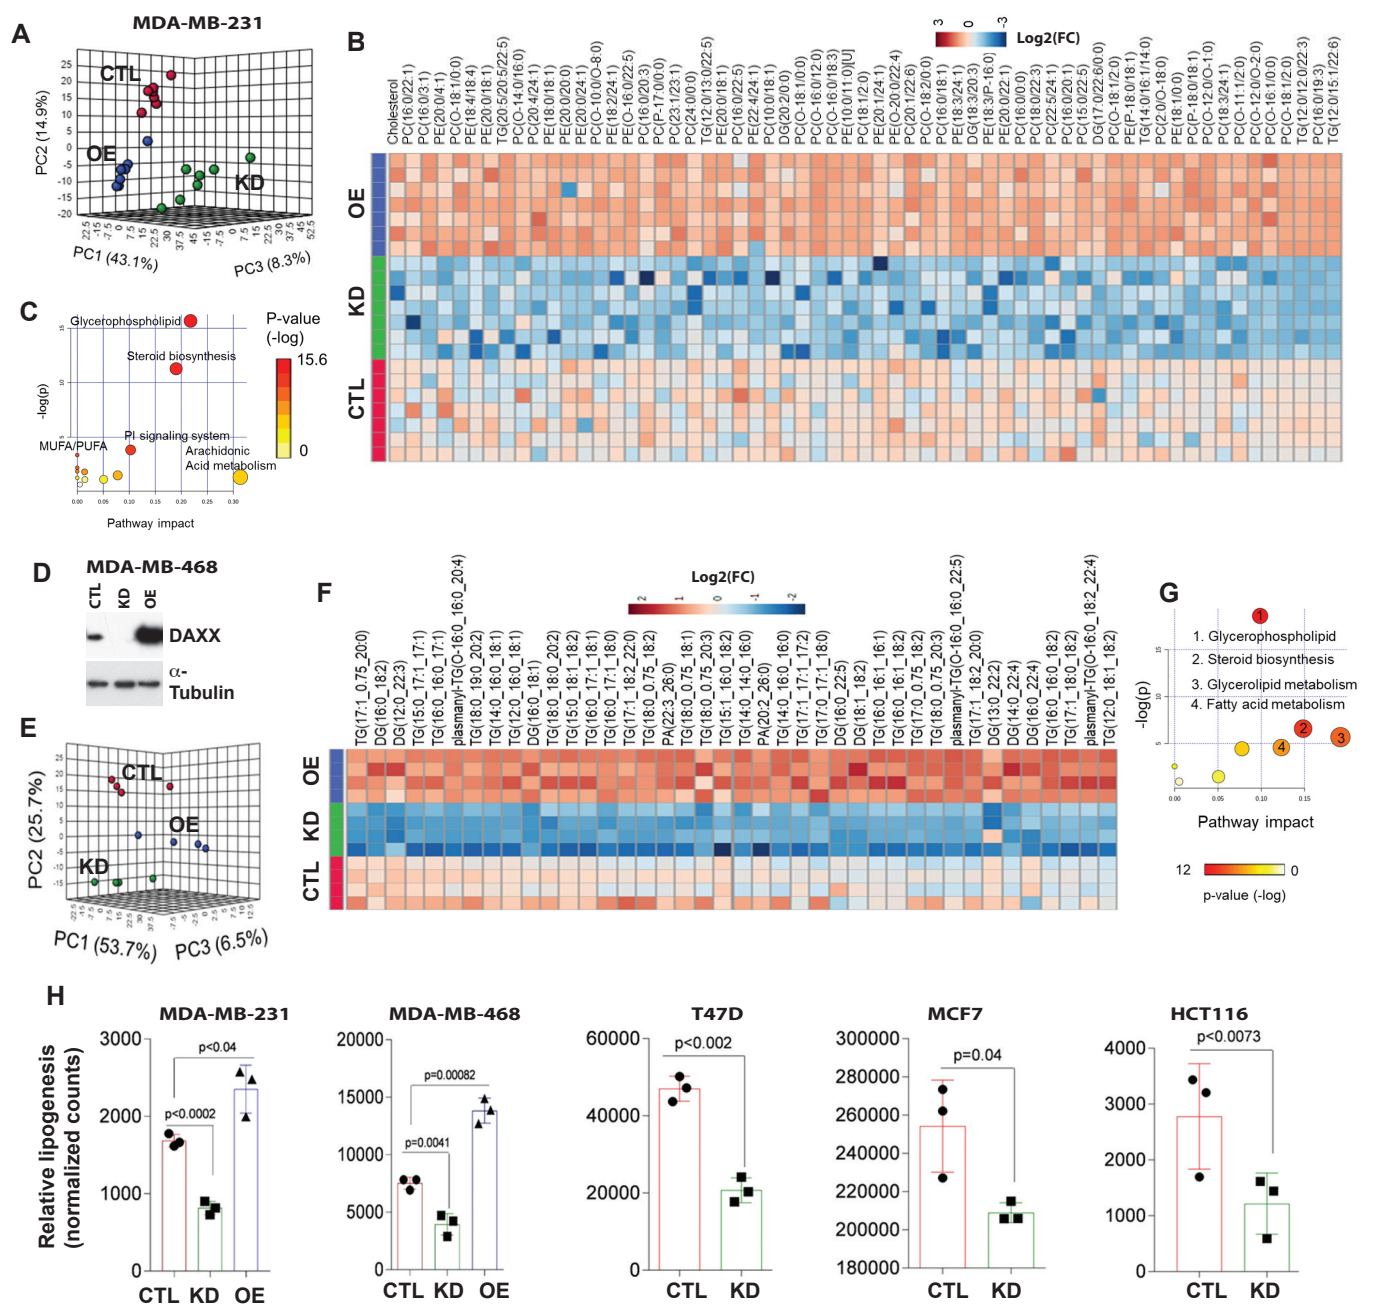

**Figure 2.** DAXX promotes lipogenesis in cancer cells.

(A) Principal component analysis comparing lipidomes of MDA-MB-231 cells (CTL, DAXX KD and OE). Each dot represents a sample (n=6). (B) Hierarchical clustering heatmap analysis of the 60 most differentially expressed lipid molecules in CTL, KD and OE MDA-MB-231 cells. (C) Significantly altered lipid pathways in MDA-MB-231 cells with DAXX OE that were identified using the KEGG pathway library with an FDR <0.05 and a pathway impact >0.5. The color and size of the circle denote p value and pathway impact respectively. The largest red circle indicates the most significantly affected pathway. (D) An immunoblotting analysis of MDA-MB-468 cells with a control vector (CTL), DAXX shRNA (KD), and DAXX cDNA (OE). (E) Principal component analysis of lipidomes of CTL, KD and OE MDA-MB-468 cells. Each dot represents a sample (n=4). (F) Hierarchical clustering heatmap analysis of top differentially changed lipid molecules in MDA-MB-468 cells. (G) Significantly altered lipid pathways in MDA-MB-468 DAXX OE cells based on lipidome as in panel C. The top 4 most altered pathways are labelled. (H) Impact of DAXX expression levels on acetate-dependent de novo lipid synthesis using [<sup>14</sup>C]-acetate labeling in the absence of serum in the indicated cell lines with different levels of DAXX expression (CTL, KD or OE).

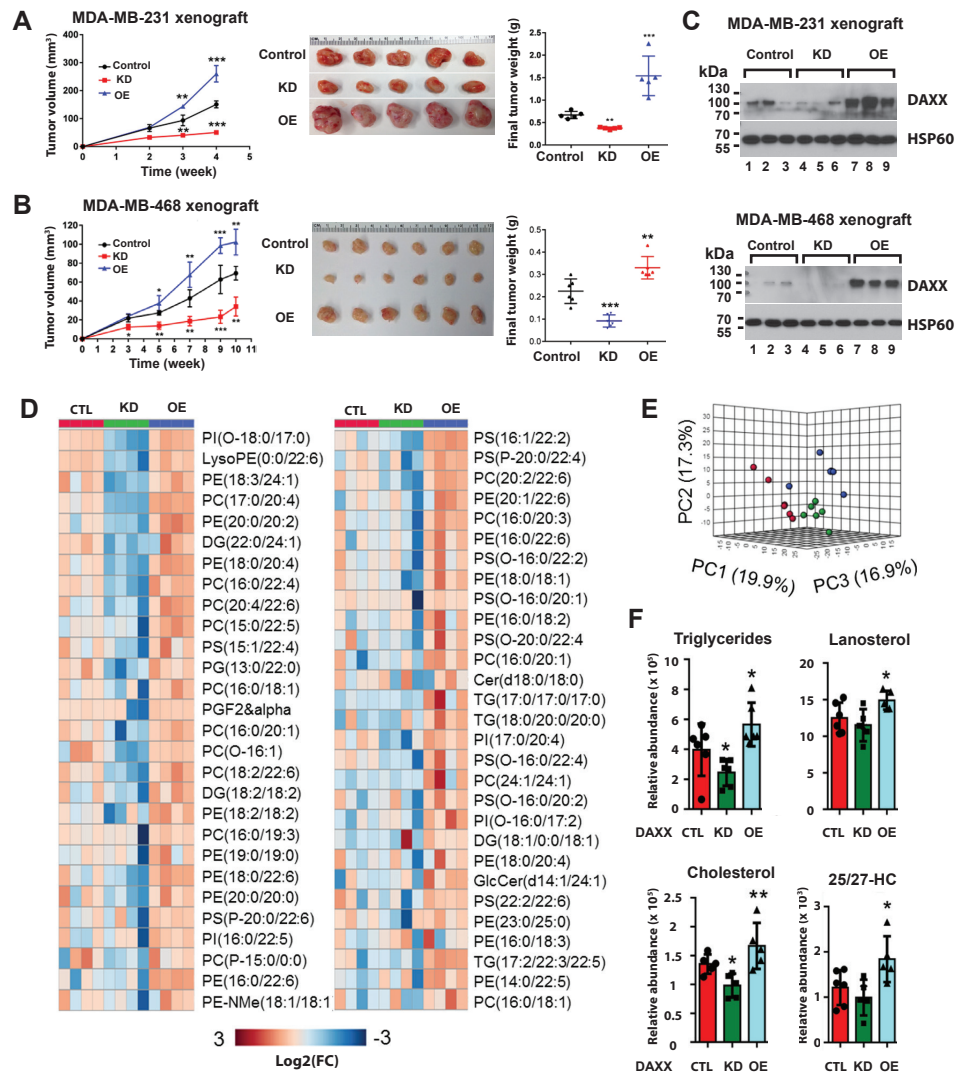

**Figure 3.** DAXX promotes tumor growth in vivo.

(A and B) Cell lines derived from MDA-MB-231 or MDA-MB-468 stably transduced with a control vector (Control, CTL), DAXX shRNA (KD), or WT DAXX cDNA (OE) were implanted into mammary fat pads of female NSG mice. Longitudinal tumor volumes are plotted. Tumor images and weights at the endpoint are shown. (C) DAXX KD and overexpression were maintained in vivo. Protein extracts from three representative xenograft tumors were analyzed for DAXX protein levels using immunoblotting. HSP60 was detected as a loading control. (D) Hierarchical clustering heatmap analysis of top glycerophospholipid molecules that were differentially produced in MDA-MB-231 xenograft tumors with different levels of DAXX. (E) Multivariate PCA of lipids shows distinct global lipid profiles in xenograft tumors derived from control (red dots), DAXX KD (green dots), and OE (blue dots) MDA-MB-231 cells. (F) Relative abundance of total triglycerides, cholesterol and derivatives in xenograft tumors derived from MDA-MB-231 cell line panel as in (A). Box plots of the indicated lipid species are shown. The p values were calculated based on Student's t-test. \*: p < 0.05; \*\*: p < 0.01. 25/27-HC: 25- or 27-hydroxycholesterol.

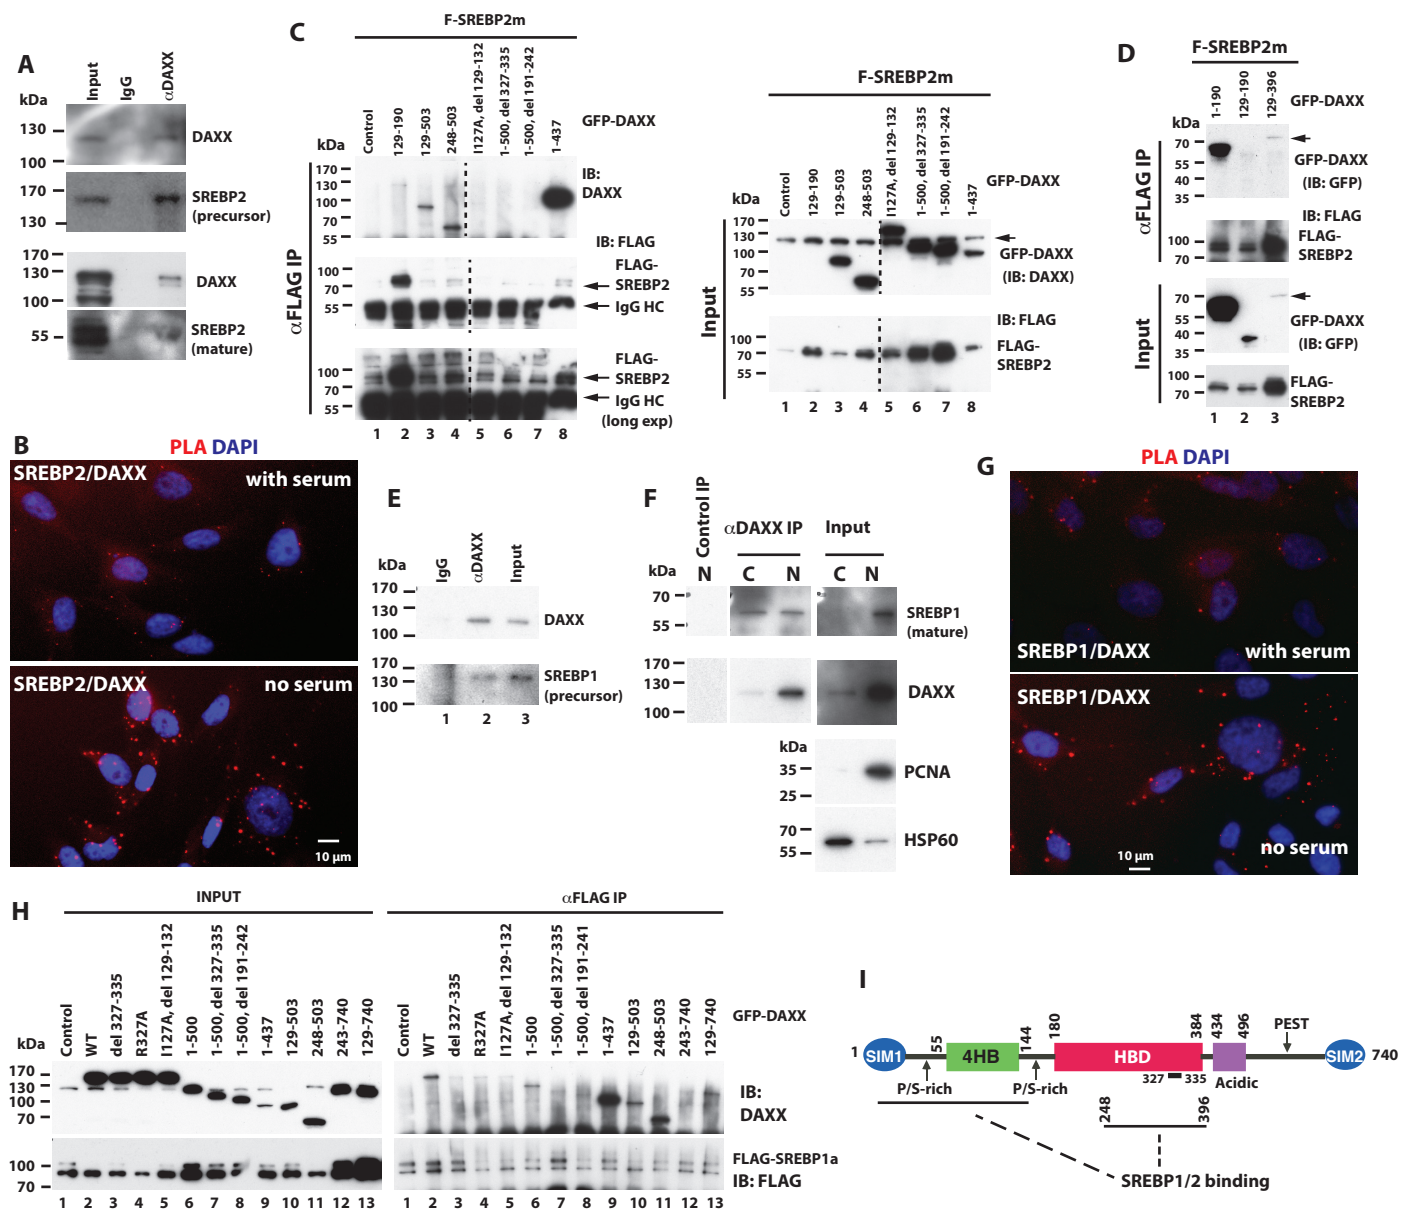

**Figure 4** DAXX binds to SREBPs.

(A) The endogenous DAXX and SREBP2 interact. MDA-MB-231 whole cell extracts were subjected to IP with a control (IgG) or an anti-DAXX antibody. The immunoprecipitated SREBP2 and DAXX were detected. (B) Representative images of Proximity Ligation Assay (PLA) showing DAXX-SREBP2 interactions in MDA-MB-231 cells in the presence or absence of serum. (C and D) There are two independent binding sites in DAXX for mature SREBP2. 293T cells were cotransfected with FLAG-SREBP2m (mature) and GFP (control) or an indicated GFP-DAXX fusion construct. The cell lysates were subjected to anti-FLAG IP. Note that the DAXX amino acid (aa) 129-190 construct is not recognized by the antibody used for detecting DAXX in C (lane 2), which was detected with a GFP antibody (panel D, lane 2). The endogenous DAXX in the input samples is denoted with an arrow in C. In D, the arrow points to the GFP-DAXX 129-396 band, which accumulated at a relatively low level. HC: heavy chain. (E and F) The endogenous DAXX and SREBP1 interact. Total MDA-MB-231 cell extracts (E), the cytoplasmic (C) or nuclear fraction (N) were subjected to IP as in panel A and the co-precipitated SREBP1 and DAXX were detected. PCNA and HSP60 were detected as a marker of nuclear and cytoplasmic fraction respectively in panel F. (G) PLA images showing DAXX-SREBP1 interactions in MDA-MB-231 cells in the presence or absence of serum as in panel B. (H) Cotransfection of FLAG-SREBP1a (mature) and the indicated GFP-DAXX fusion constructs, IP and immunoblotting experiments were performed as in C. (I) Schematic drawing of DAXX-SREBP interactions. The position of aa 327-335 within the DAXX HBD critical for the DAXX-SREBP interactions is indicated. SIM: SUMO-interacting motif; 4HB: DAXX helical bundle; HBD: histone-binding domain; PEST: proline, glutamic acid, serine, and threonine-rich sequence. Numbers refer to aa residue positions in the DAXX protein. In panel C, vertically sliced images from the same gel are juxtaposed as indicated.

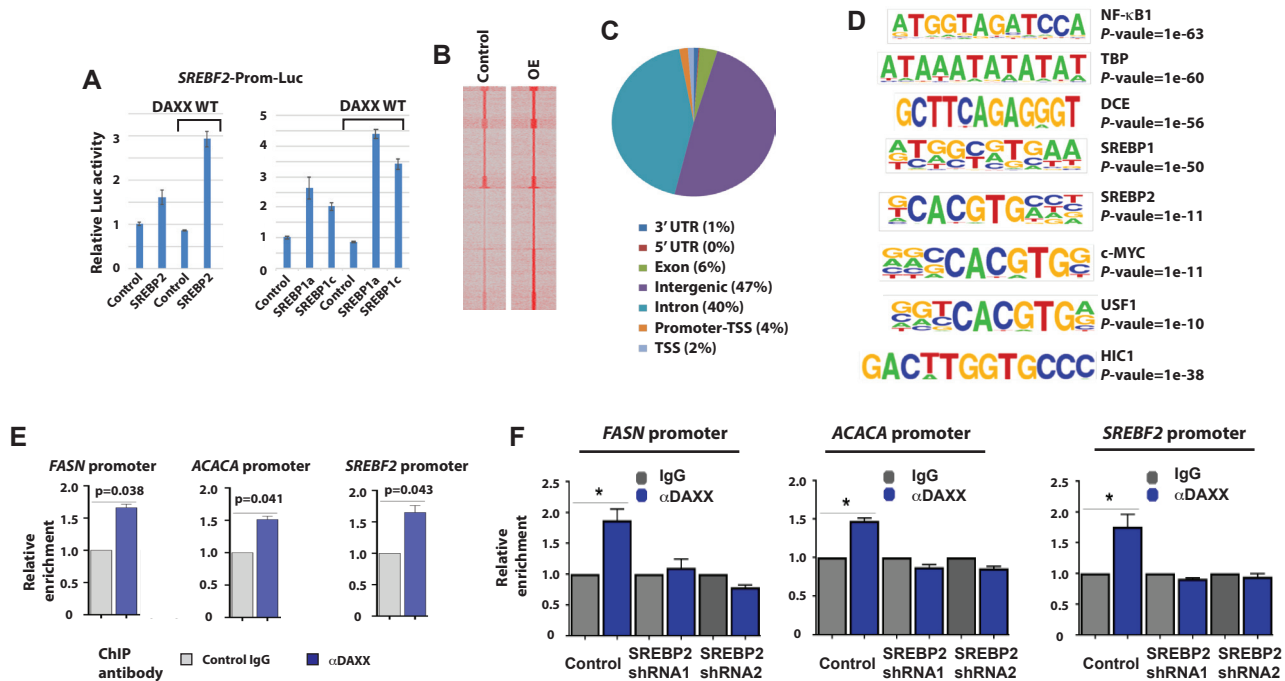

**Figure 5.** DAXX activates SREBP-mediated transcription and occupies the promoters of lipogenic genes.

(A) MDA-MB-231 cells were transfected with a luciferase reporter driven by a promoter fragment from the SREBF2 gene along with mature SREBP2, SREBP1a, SREBP1c, or wt DAXX cDNA as indicated. Dual luciferase assays were done. (B) ChIP-seq signal intensity heat maps in MDA-MB-231 control and DAXX OE cell lines; signals are centralized to transcriptional start sites (TSS). (C) The genome-wide distribution of DAXX chromatin occupancy. (D) Motifs enriched as determined by the DAXX ChIP-seq dataset of MDA-MB-231 DAXX OE cells. (E) MDA-MB-231 cells stably expressing WT DAXX were subjected to ChIP with a control IgG and an anti-DAXX antibody. The precipitated DNAs were subjected to qPCR with primers specific to promoter regions of the indicated genes. (F) SREBP2 is critical for DAXX to bind lipogenic gene promoters. MDA-MB-231 cells with a control vector or a SREBP2 shRNA vector were subjected to ChIP with a control IgG, or an anti-DAXX antibody followed by qPCR with primers specific to the indicated gene promoters.

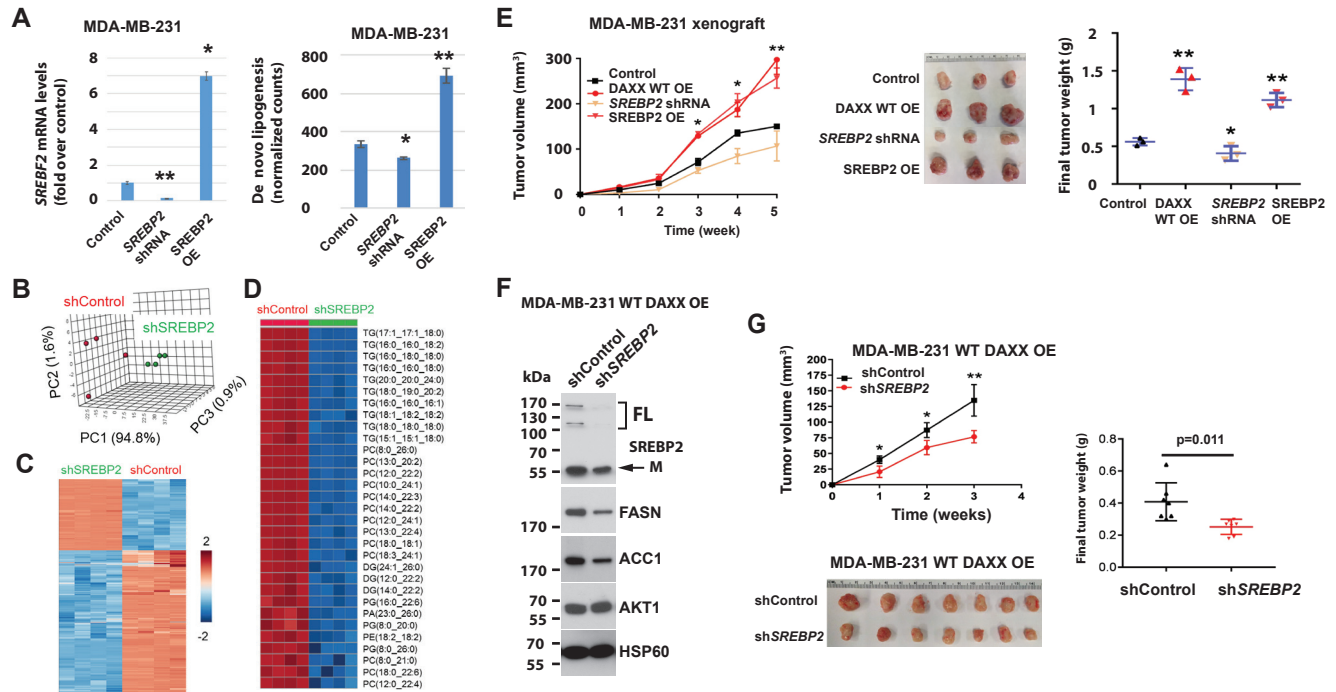

**Figure 6.** SREBP2 knockdown impairs DAXX-mediated tumor growth.

(A) Cells derived from MDA-MB-231 cell line with a vector for a control, an SREBF2 shRNA, or SREBP2 (mature) cDNA were subjected to RT-qPCR for assessing SREBP2 expression, and de novo lipogenesis assays using [<sup>14</sup>C] acetate. (B) PCA of lipidomes in shControl and shSREBP2 cells. Each dot represents a sample (n=4). (C) Hierarchical clustering heatmap analysis demonstrates global lipid landscape in shSREBP2 cells compared to shControl cells. (D) Hierarchical clustering heatmap analysis of lipids including glycerolipid and glycerophospholipid molecules that were highly downregulated in shSREBP2 cells compared to control cells. (E) MDA-MB-231-derived cells (Control, DAXX OE, SREBP2 shRNA and mature SREBP2 OE) were xenografted into mammary fat pads of female NSG mice. Tumor volumes were plotted against time. Representative images of dissected tumors are shown. The final tumor weights are plotted. (F) Control or SREBF2 shRNA were expressed in MDA-MB-231 cells with DAXX OE. The levels of the indicated proteins were assessed by immunoblotting. (G) The indicated cells shown in panel F were xenografted into mammary fat pads of female NSG mice. Tumor volumes were plotted against time. Representative images of dissected tumors are shown. The final tumor weights are plotted. The p values were calculated (vs. control) based on Student's t-test. \*: p < 0.05; \*\*: p < 0.01.

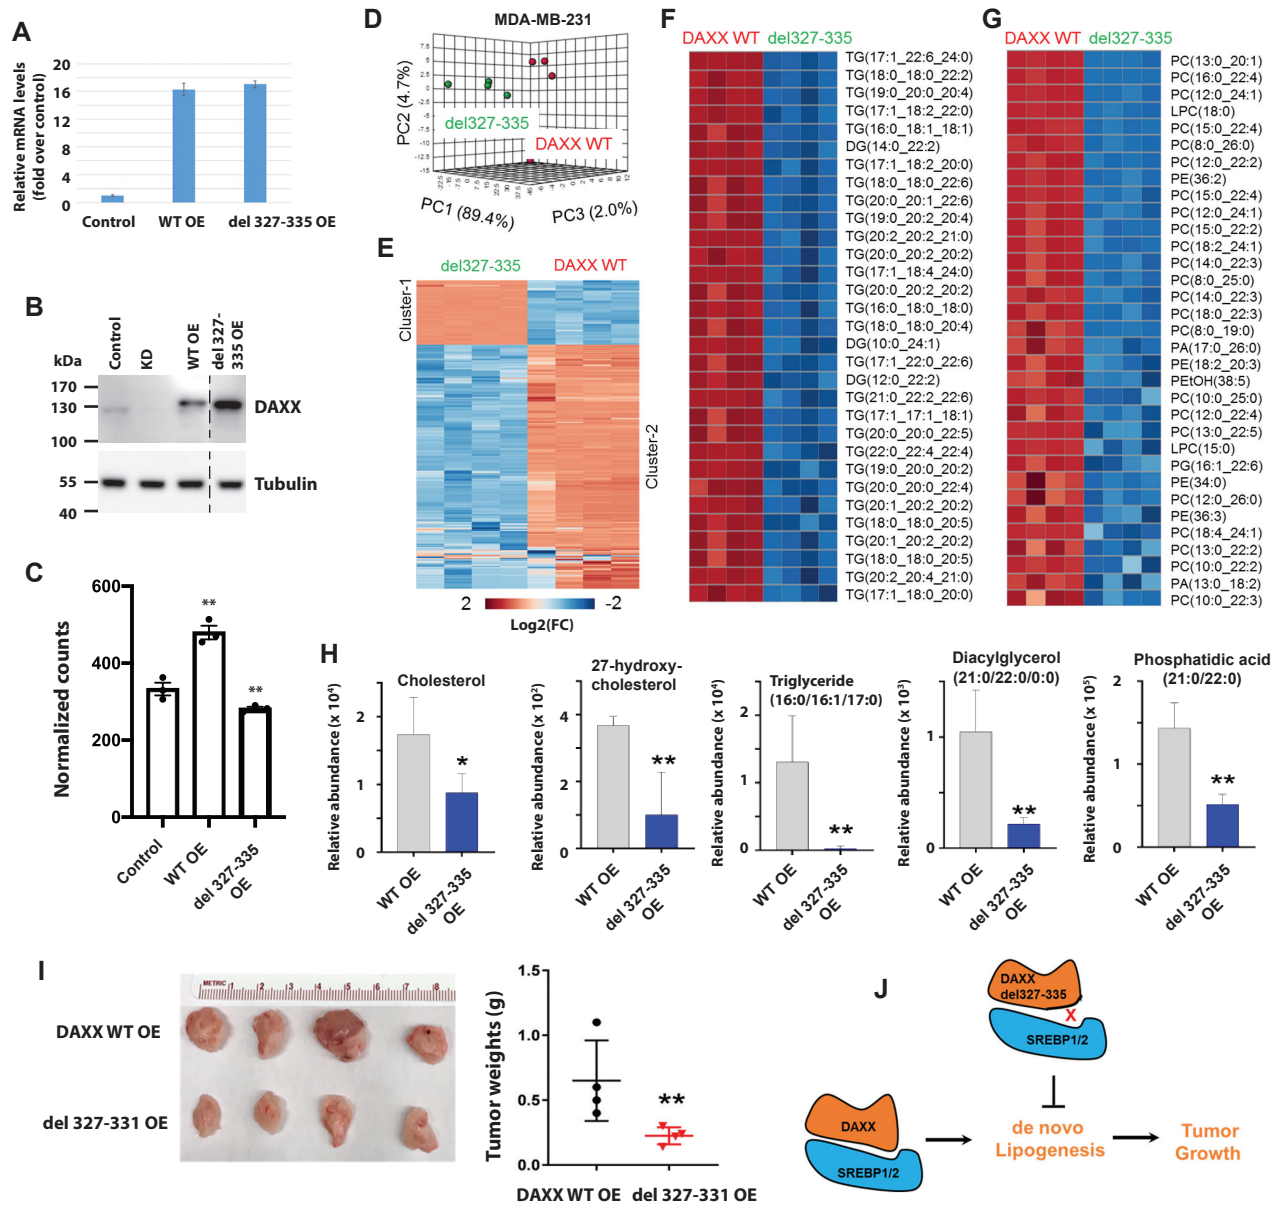

**Figure 7.** The DAXX-SREBP interaction is critical for lipogenesis and tumor growth.

(A) Relative mRNA levels of DAXX in MDA-MB-231 cells expressing the WT or del 327-335 mutant cDNA of DAXX as determined by RT-qPCR. (B) Protein levels of DAXX in control cells and those with DAXX KD, WT and del 327-335 mutant cDNA of DAXX. (C) The DAXX del 327-337 mutant impaired de novo lipogenesis. Serum-starved cells were labeled with [<sup>14</sup>C] acetate and total lipids were isolated. Radioactivity was counted and normalized against total protein level. (D) PCA of lipidomes in MDA-MB-231 cells expressing the del327-335 mutant and WT DAXX. Each dot represents a sample (n=4). (E) Hierarchical clustering heatmap analysis of global lipidomes in cells expressing the del327-335 mutant and WT DAXX. (F) Hierarchical clustering heatmap analysis of glycerolipid molecules that were highly differentially expressed between MDA-MB-231 cells with the del 327-335 mutant and wt DAXX. (G) Hierarchical clustering heatmap analysis of glycerophospholipid molecules that were highly differentially expressed between MDA-MB-231 cells with the del 327-335 mutant and WT DAXX. (H) Bar graphs of relative normalized abundance of specific lipids in MDA-MB-231 cells expressing the del 327-335 mutant and WT DAXX. (I) MDA-MB-231 cells expressing the del 327-335 mutant and WT DAXX were xenografted into mammary fat pads of female NSG mice. Representative images of dissected tumors are shown. The final tumor weights are plotted. (J) A cartoon depicting the importance of DAXX-SREBP interaction for lipogenesis and tumorigenesis. The p values were calculated (vs. control) based on Student's t-test. \*: p < 0.05; \*\*: p < 0.01.



## Mahmud et al. Supplementary Figures and Tables

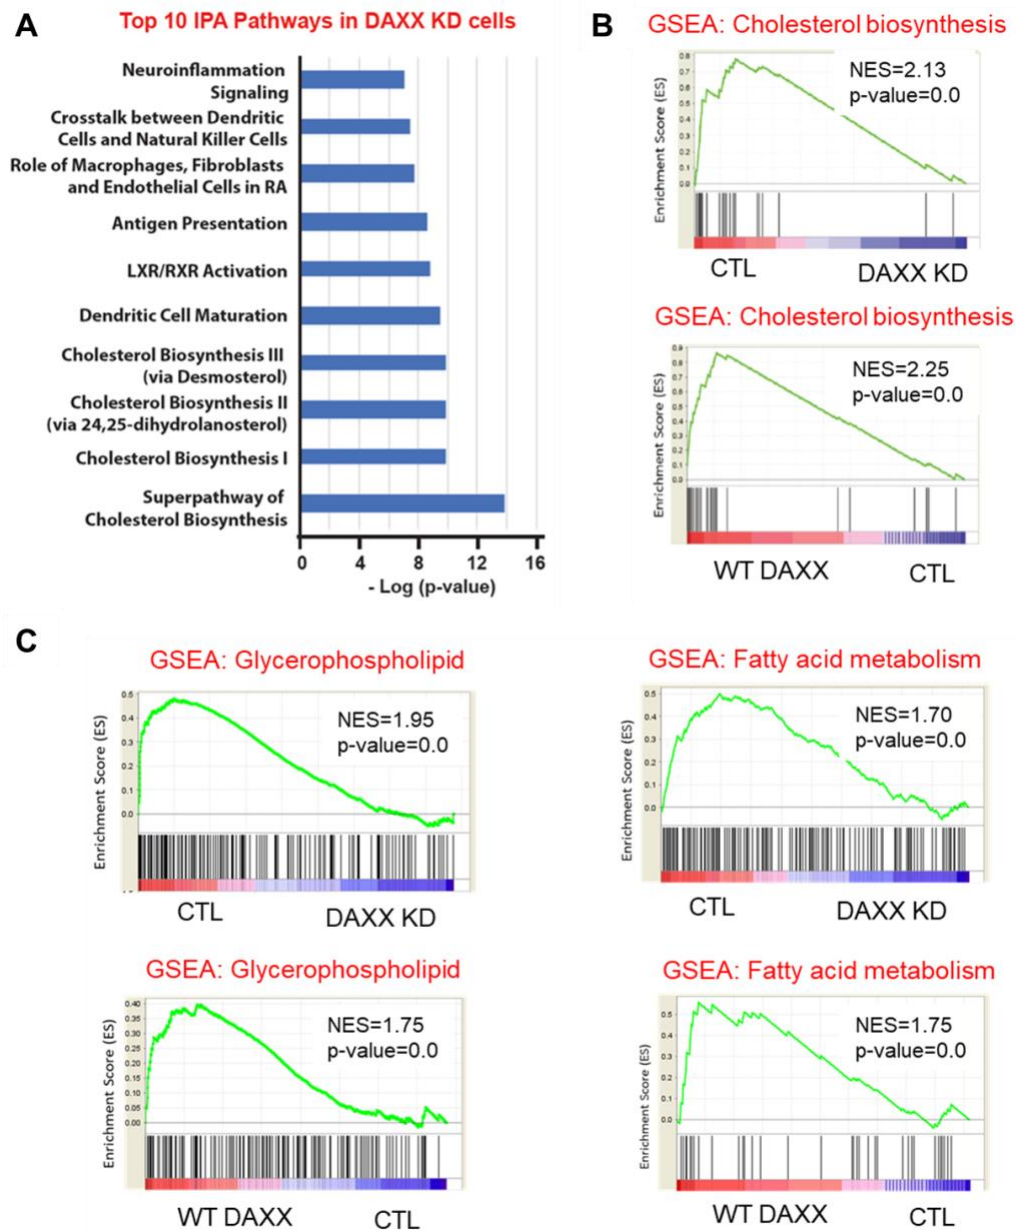

### Supplementary Figure S1. DAXX expression correlates with de novo lipogenesis pathway.

- (A) Ingenuity pathway analysis (IPA) using differentially expressed genes in DAXX KD cells compared to CTL cells identifies de novo lipogenesis as the most perturbed canonical pathways.
- (B) Gene set enrichment analyses (GSEA) shows downregulation or upregulation of genes in the cholesterol biosynthesis in MDA-MB-231 cells with DAXX KD or WT DAXX OE, respectively. The KEGG and Reactome genesets were used for the GSEA plots.

(C) Gene set enrichment analyses (GSEA) shows downregulation or upregulation of genes in the fatty acid, glycerophospholipid, and glycerolipid metabolism in MDA-MB-231 cells with DAXX KD or WT DAXX OE, respectively. The KEGG and Reactome genesets were used for the GSEA plots.

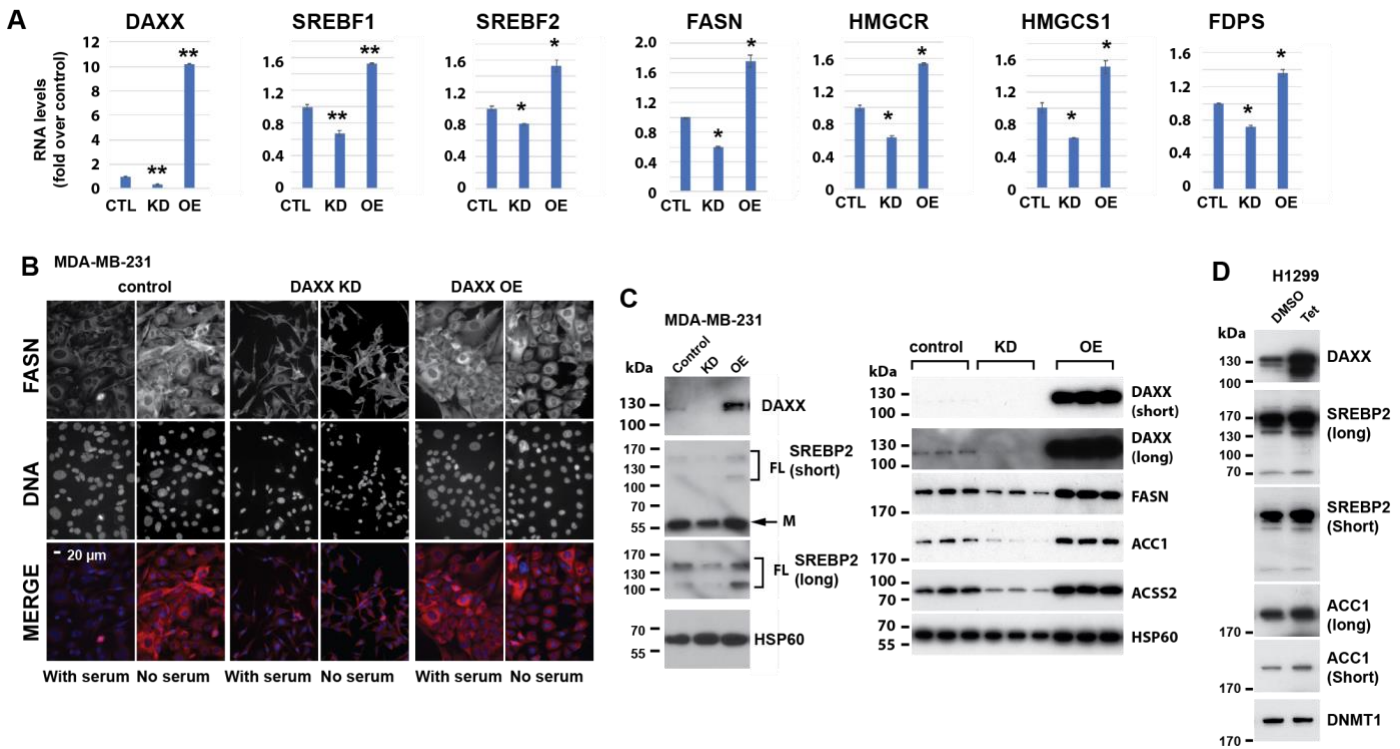

### Supplementary Figure S2. DAXX promotes lipogenic gene expression.

- (A) Total RNAs were isolated from MDA-MB-231 cells stably transfected with a control vector (CTL), a DAXX shRNA (KD), the WT DAXX cDNA (OE) and subjected to RT-qPCR analysis. The mRNA levels of the indicated genes were normalized against that of ACTB. Data are shown as mean of fold-changes vs. control (CTL)  $\pm$  SEM (n=3). \*:  $p < 0.05$ , \*\*:  $p < 0.01$  (t-test vs CTL).
- (B) MDA-MB-231-derived cells were cultured in the presence of serum or serum-starved for 24 hours. The cells were then fixed and stained with an anti-FASN polyclonal antibody (red) and counterstained with DAPI for visualizing nuclei (blue). The cells were imaged using a fluorescence microscope. All images were captured with the same duration of light exposure for the red or blue channel.
- (C) Immunoblotting analysis of cell extracts of the MDA-MB-231-derived cell lines with antibodies against the indicated proteins.
- (D) Immunoblotting analysis of cell extracts of the H1299 cells expressing tetracycline (Tet)-inducible wt DAXX in the presence of control (DMSO) or Tet with antibodies against the indicated proteins.

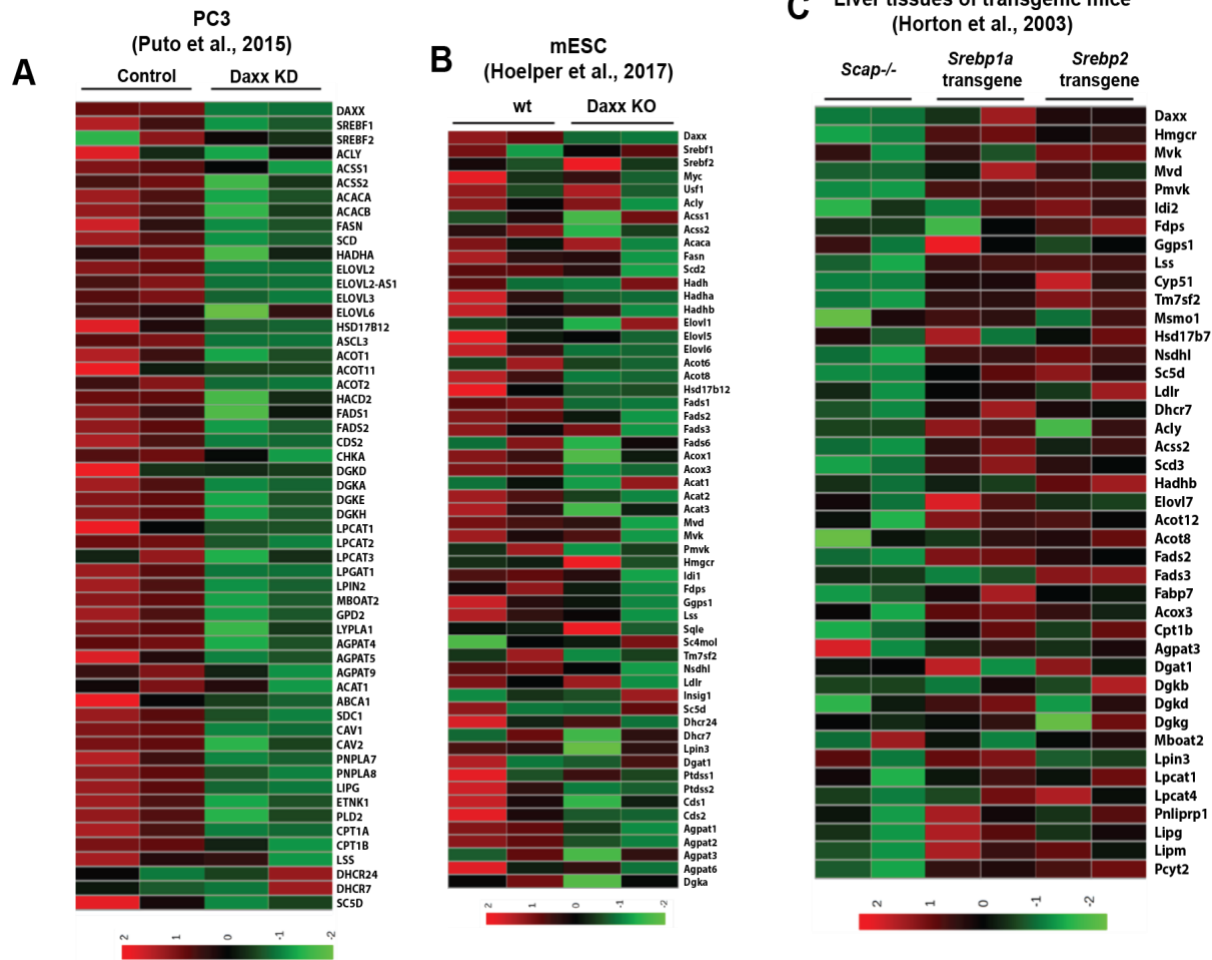

**Supplementary Figure S3. DAXX, SREBP1 and SREBP2 are key regulators for lipogenic gene expression.**

- (A)** Heatmap of the indicated lipogenic genes in control and DAXX KD cells of the human prostate cancer PC3 cell line.
- (B)** Heatmap of the indicated lipogenic genes in wt and Daxx KO cells of the mouse embryonic stem cells (mESC).
- (C)** Heatmap of the indicated lipogenic genes in liver tissues from mice with Scap deletion (Scap<sup>-/-</sup>), the nuclear form of Srebp1a or Srebp2 transgene.

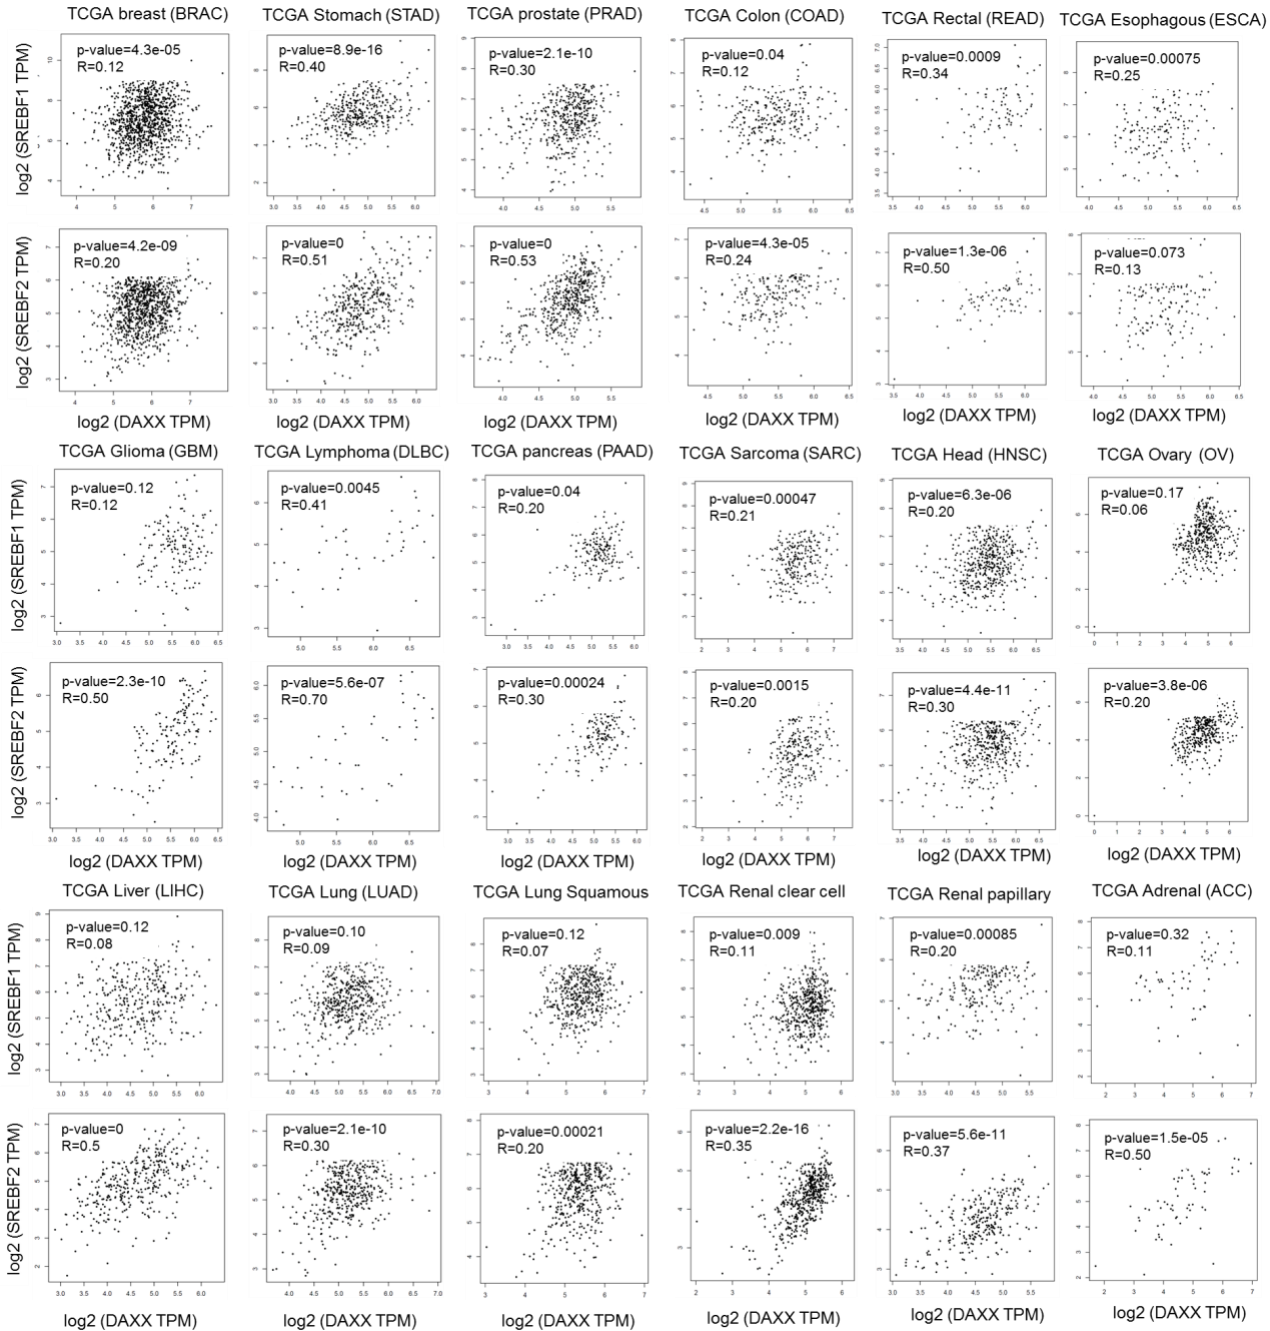

**Supplementary Figure S4. The mRNA expression of DAXX and SREBP1/2 is positively correlated in eighteen different human cancer types based on the Pearson correlation coefficient analysis of TCGA datasets.**

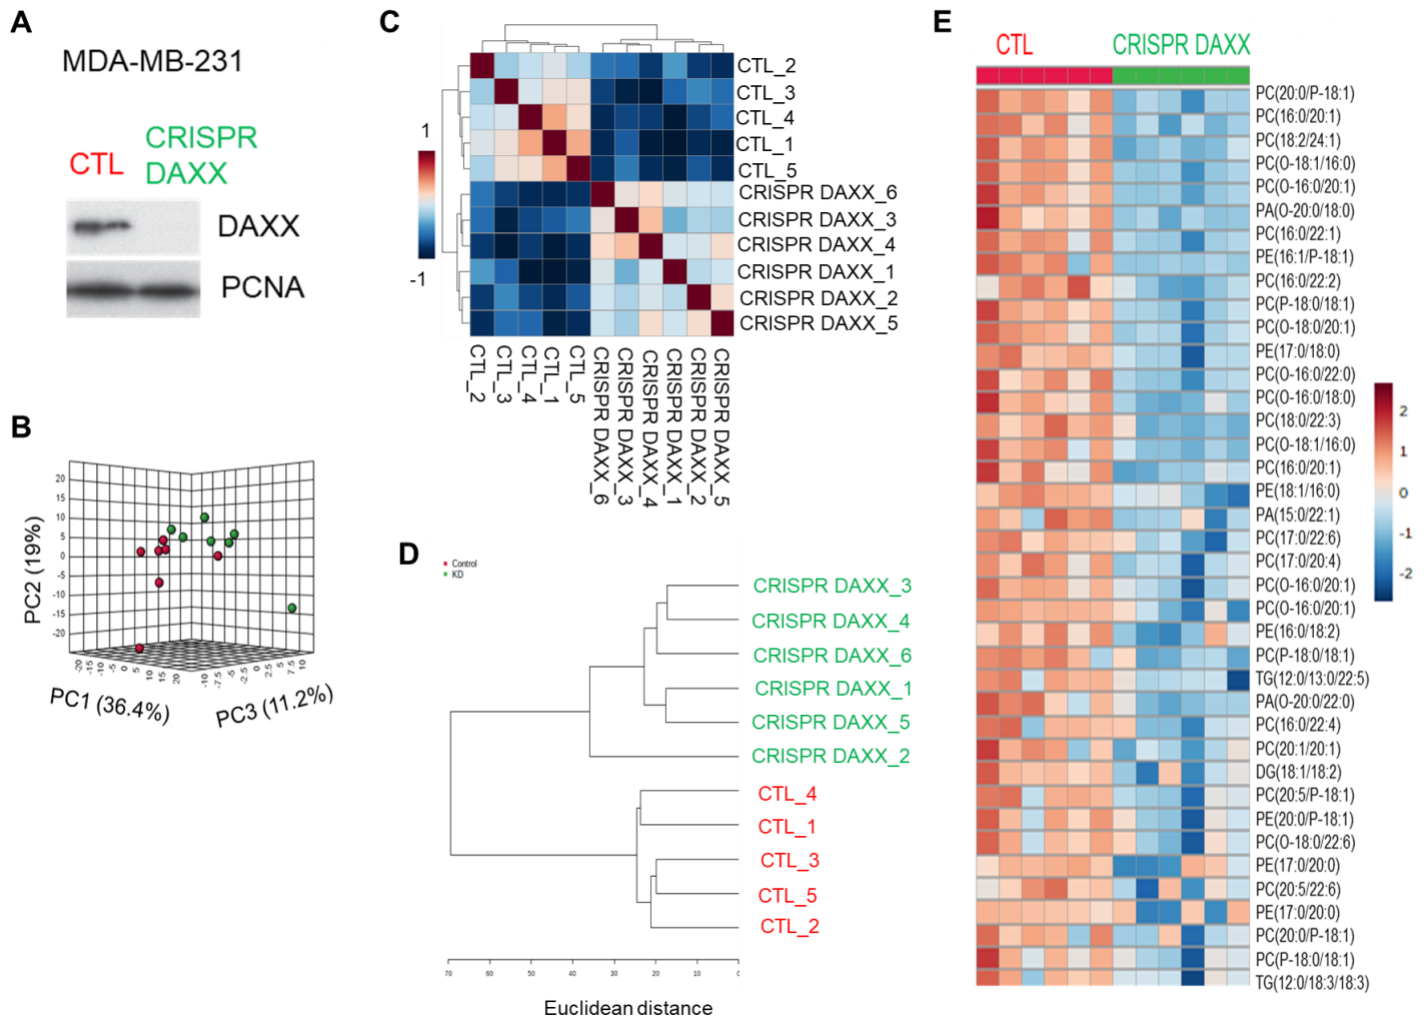

**Supplementary Figure S5. CRISPR/Cas9-mediated DAXX depletion suppressed de novo lipogenesis.**

- (A) Western blot showing DAXX depletion in an MDA-MB-231 clone with a guide RNA targeting DAXX compared to control (CTL) cells.
- (B) The PCA analysis of lipidomes in control (CTL, red dots) and CRISPR-DAXX MDA-MB-231 (green dots) cells (n=6), which indicates distinct global lipid profiles in these two MDA-MB-231 cell lines.
- (C) The Pearson correlation coefficient analysis of lipids in CTL and CRISPR-DAXX MDA-MB-231 cells show clear clustering of CTL and CRISPR-DAXX cells.
- (D) The hierarchical clustering dendrogram analysis of lipids in CTL and CRISPR-DAXX MDA-MB-231 cells.
- (E) The hierarchical heatmap analysis of lipids in CTL and CRISPR-DAXX MDA-MB-231 cells demonstrate reduced levels of specific lipid molecules in cells with DAXX depletion.

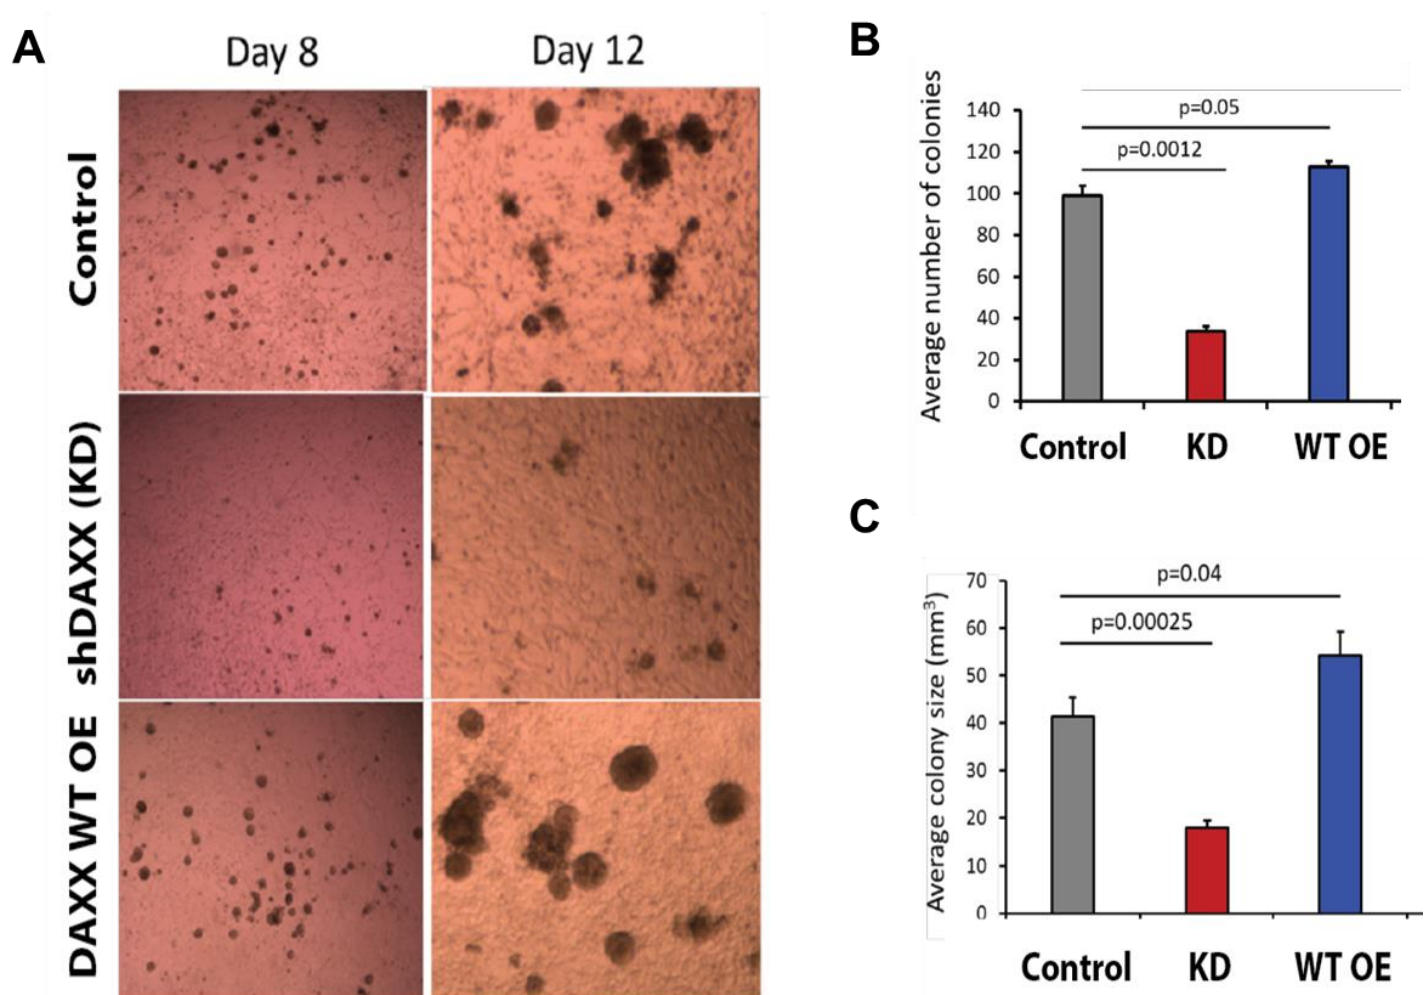

**Supplementary Figure S6. DAXX promotes cell proliferation and 3D colony growth in vitro.**

- (A) MDA-MB-231-derived cell lines (Control, DAXX KD, and DAXX OE) were cultured in a suspension with Matrigel and complete DMEM medium. The 3D colonies of each line were imaged at the indicated time.
- (B) Average colony number shown as bar graph and were quantified at Day 12.
- (C) Average colony size shown as bar graph and were quantified at Day 12.

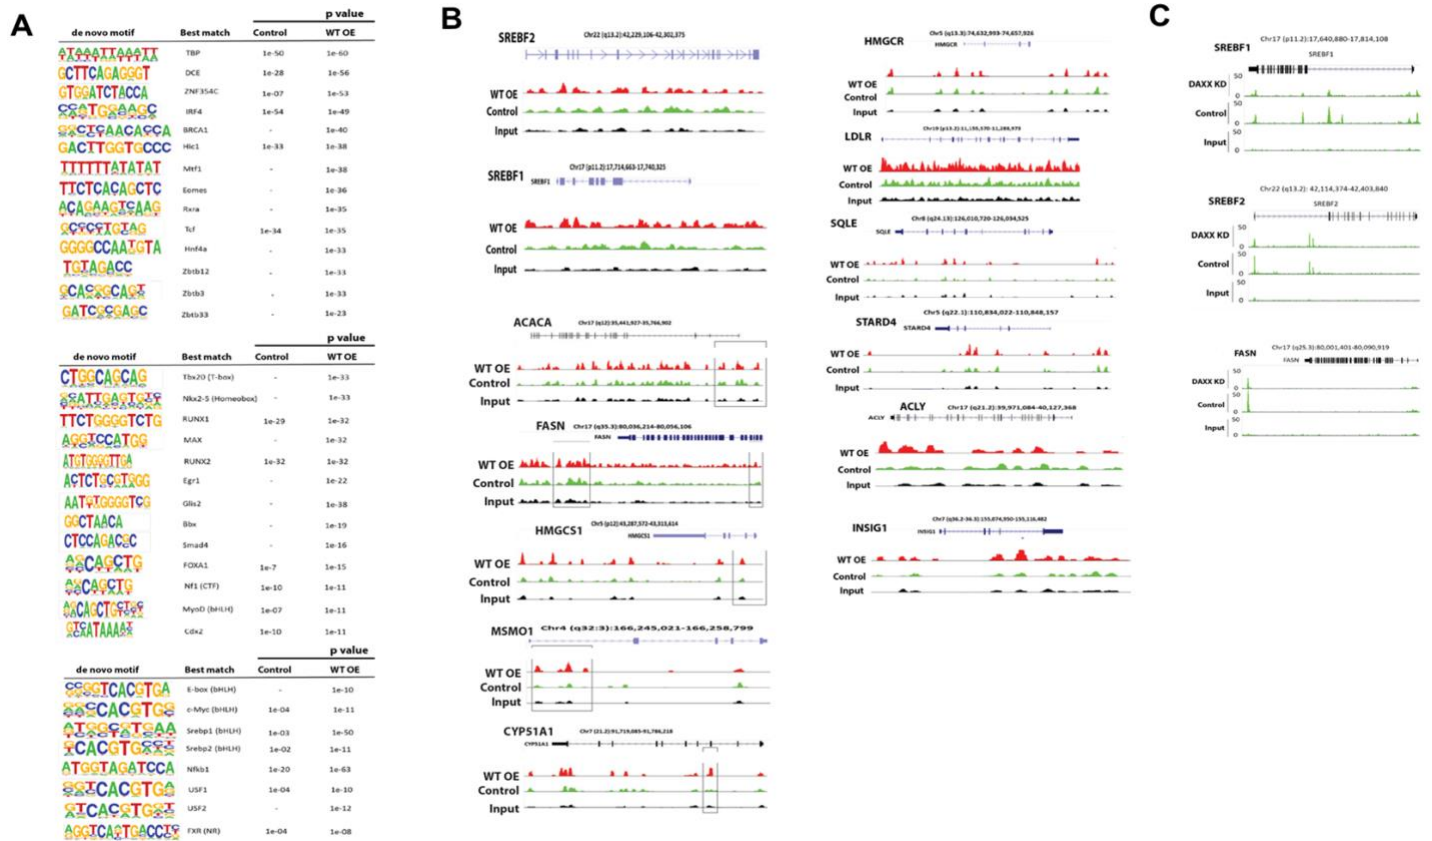

### Supplementary Figure S7. Chromatin-binding activity of DAXX.

- (A) De novo motifs associated with DAXX as revealed by ChIP-seq. DAXX ChIP-seq and motif analysis were done as in Figure 5. Motifs enriched in MDA-MB-231-derived cells (control and DAXX OE) are shown.
- (B) DAXX chromatin-binding profiles of the indicated individual lipogenic genes in MDA-MB-231-derived cells (control and wt OE) are depicted.
- (C) DAXX chromatin-binding profiles of the indicated individual lipogenic genes in PC3-derived cells (control vs. KD; Puto et al., 2015) are shown.



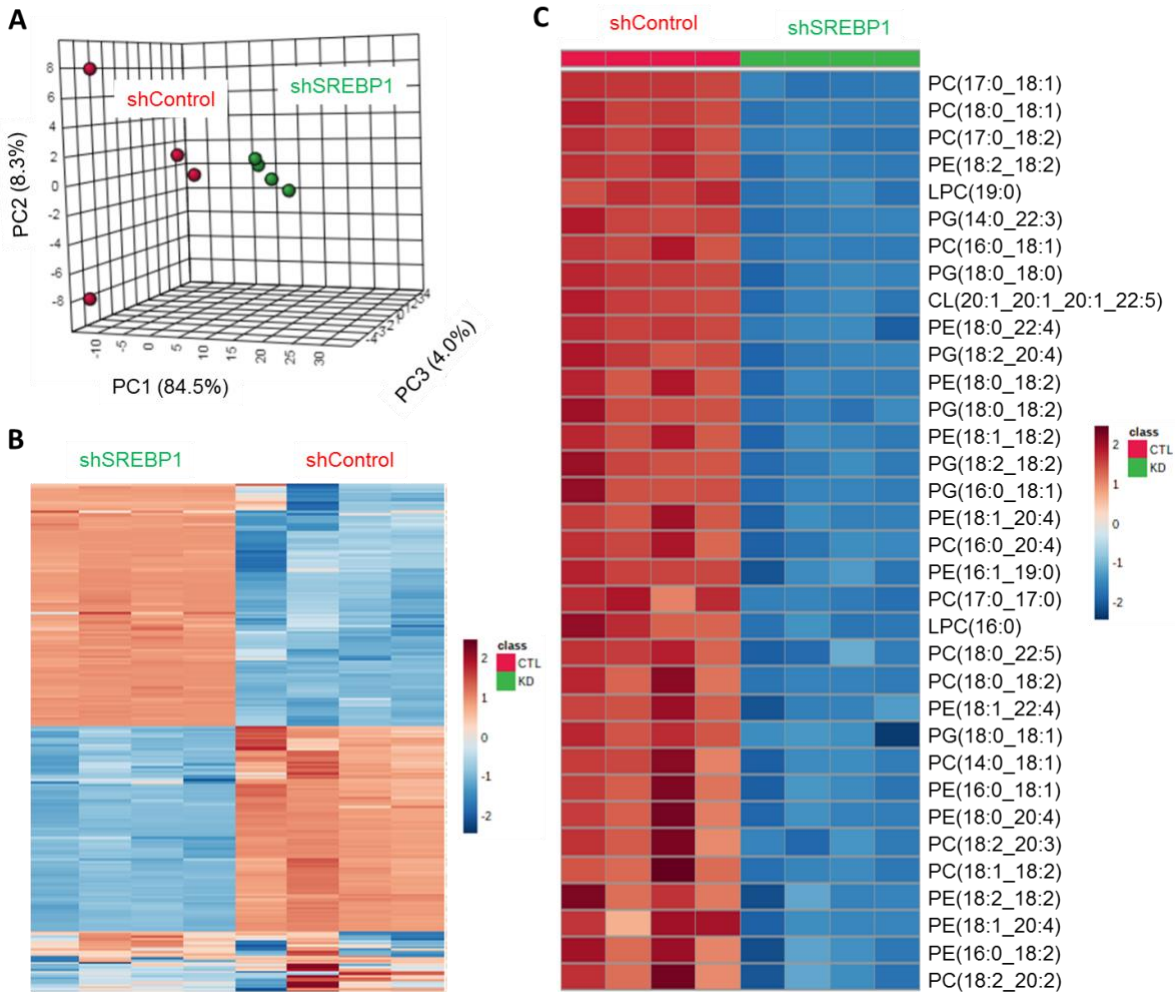

**Supplementary Figure S8. Genetic knockdown of SREBP1 markedly impact global lipid profile.**

- (A) Principal component analysis comparing lipidomes between shControl and shSREBP1 cells derived from MDA-MB-231 cell line. Each dot represents an independent sample (n=4).
- (B) Hierarchical clustering heatmap analysis demonstrates global lipid landscape in shSREBP1 cells compared to shControl cells.
- (C) Hierarchical clustering heatmap analysis of top differentially changed lipids including glycerolipid and glycerophospholipid molecules in MDA-MB-231 with SREBP1 KD compared to control cells.

### Supplementary Table S1 PCR primers used for this study

| <b>RT-qPCR primers (5' to 3')</b> |                         |
|-----------------------------------|-------------------------|
| ActinB-F-Real                     | GCTCCTCCTGAGCGCAAGTACTC |
| ActinB-R-Real                     | GTGGACAGCGAGGCCAGGAT    |
|                                   |                         |
| Daxx-RT-F                         | GAGGCGTCTCTCCTCACAAC    |
| Daxx-RT-R                         | TTCATGCACTGACCTTTGC     |
|                                   |                         |
| SREBP1-F                          | CTGCTGTCCACAAAAGCAAA    |
| SREBP1-R                          | GGTCAGTGTGTCTCCACCT     |
|                                   |                         |
| SREBP2-F                          | ATCGCTCCTCCATCAATGAC    |
| SREBP2-R                          | TTCCTCAGAACGCCAGACTT    |
|                                   |                         |
| FASN-F                            | CACAGGGACAACCTGGAGTT    |
| FASN-R                            | ACTCCACAGGTGGGAACAAG    |
|                                   |                         |
| HMGCR-F                           | GTCATTCCAGCCAAGGTTGT    |
| HMGCR-R                           | CATGGCAGAGCCCACTAAAT    |
|                                   |                         |
| HMGCS1-F                          | GGGACACATATGCAACATGC    |
| HMGCS1-R                          | CACTGGGCATGGATCTTTTT    |
|                                   |                         |
| FDPS-RT-F                         | CCAAGAAAAGCAGGATTTTCG   |
| FDPS-RT-R                         | CCGTTATACTTGCTCCAA      |

| <b>ChIP primers</b> |                      |
|---------------------|----------------------|
| FASN-prom-F1        | TAGAGGGAGCCAGAGAGACG |
| FASN-prom-R1        | GCTGCTCGTACCTGGTGAG  |
|                     |                      |
| ACACA-prom-F1       | CAAGGGAAATTGAGGCTGAG |
| ACACA-prom-R1       | CGTTCAGGAGCATCTGATT  |
|                     |                      |
| SREBF-prom-F2       | TCCTTTAAACAAGGCGGAGA |
| SREBF-prom-R2       | TCAGCAGCTCAGATTTGCAT |

**Primers for amplifying a fragment in the SREBF2 promoter**

|                |                                                                                                                                    |
|----------------|------------------------------------------------------------------------------------------------------------------------------------|
| SREBF2-prom-F1 | CAGCTGAAGCTTGCATGCCTGCAGGTAGGCAGCTGGGAAGATGA                                                                                       |
| SREBF2-prom-R1 | GAGTATATATAGGACTGGGGATCCGTGAGGGTCTCCATGGTCTC                                                                                       |
|                | Note: The sequences in red are specific to the SREBF2 promoter region; and the sequences in black correspond to the cloning vector |

### Supplementary Table S2 Antibodies used in this study

| Antibody target                        | Vendor/source                            | Vendor catalog # | Dilution                                                         |
|----------------------------------------|------------------------------------------|------------------|------------------------------------------------------------------|
| DAXX                                   | Bethyl laboratories                      | A301-353A        | 1:20,000 (IB)                                                    |
| DAXX (for IP, IB, IF PLA, and ChIP)    | The Developmental Studies Hybridoma Bank | PCRP-DAXX-5G11   | Hybridoma supernatant. 1:100 for IB, 1:5 for IF, and 1:2 for PLA |
| DAXX (for IP and IB)                   | GenScript, rabbit polyclonal             | This study       | 1:10,000 for IB                                                  |
| FASN (for IB and IF)                   | ProteinTech                              | 10624-2-AP       | 1:20,000 for IB, and 1:700 for IF                                |
| FASN                                   | Santa Cruz                               | SC-55580         | 1:20,000 (IB)                                                    |
| ACC1                                   | Cell Signaling Technology                | 3676             | 1:20,000 (IB)                                                    |
| ACSS2                                  | Cell Signaling Technology                | 3658             | 1:20,000 (IB)                                                    |
| SREBP2                                 | Abcam                                    | ab30682          | 1:10,000 for IB, 1:300 for IF and 1:100 for PLA                  |
| SREBP2                                 | BD Biosciences                           | 557037           | 1:1,000 (IB)                                                     |
| SREBP1                                 | Santa Cruz                               | SC-13551         | 1:5,000 (IB)                                                     |
| SREBP1                                 | ProteinTech                              | 4088-1-AP        | 1:3,000 for IB, 1:300 for IF and 1:100 for PLA                   |
| FLAG                                   | Cell Signaling Technology                | 14793            | 1:10,000 (IB)                                                    |
| FLAG (IB, IP and ChIP)                 | Millipore-Sigma                          | F1804            | 1:1,000 (IB)                                                     |
| GFP                                    | Cell Signaling Technology                | 2956             | 1:3,000 (IB)                                                     |
| PCNA                                   | Epitomics                                | 2714-1           | 1:20,000 (IB)                                                    |
| alpha-Tubulin                          | Millipore-Sigma                          | T5168            | 1:50,000 (IB)                                                    |
| HSP60                                  | BD Transduction Laboratories             | H99020           | 1:50,000 (IB)                                                    |
| Rabbit IgG HRP-linked antibody         | Cell Signaling Technology                | 7074             | 1:10,000 (IB)                                                    |
| Mouse IgG HRP-linked antibody          | Cell Signaling Technology                | 7076             | 1:10,000 (IB)                                                    |
| Normal mouse IgG (for IP/ChIP control) | Santa Cruz                               | SC-2025          |                                                                  |
